# Supplementary material for: Synthesis and antiproliferative efficiency of novel bis(imidazol-1-yl)vinyl-1,2,4-oxadiazoles
Source: Royal Society of Chemistry journal article supplement (doi:10.1039/c5nj02925b), 2016-01-01

## Electronic Supplementary Information for New Journal of Chemistry

### Synthesis and Antiproliferative efficiency of novel bis(imidazol-1-yl)vinyl-1,2,4-oxadiazoles

Kebballi. N. Nandeesh,<sup>a#</sup> Hassan. A. Swarup,<sup>a#</sup> Nagarakere. C. Sandhya,<sup>a#</sup> Chakrabhavi. D. Mohan,<sup>a</sup>  
Chottanahalli. S. Pavan Kumar,<sup>a</sup> Manikyanahalli. N. Kumara,<sup>b</sup> Kempegowda Mantelingu<sup>a</sup>, Sannaiah Ananda,<sup>a\*</sup>  
Kanchugarakoppal. S. Rangappa,<sup>a\*</sup>

| Contents                                                         | Page |
|------------------------------------------------------------------|------|
| 1. General information                                           | 2    |
| 2. General procedure for the synthesis of oxadiazoles            | 2    |
| 3. <sup>1</sup> H NMR and <sup>13</sup> C NMR of compounds 3a-3o | 3-33 |
| 4. ORETP of 3n                                                   | 29   |

## 1. General information

Materials and methods: All work relating to analytical thin layer chromatography were performed with E. Merck silica gel 60F<sub>254</sub> aluminum plates and were visualized with UV light. The following mobile phases were employed for TLC: chloroform, methanol and hexane, and ethyl acetate in different ratios. The instrumental techniques employed for the characterization of the newly synthesized compounds include <sup>1</sup>H and <sup>13</sup>C NMR and mass spectroscopy. <sup>1</sup>H and <sup>13</sup>C NMR spectra were recorded on a Agilent WM (400MHz) Fourier transforms spectrophotometer in CDCl<sub>3</sub> or DMSO-d<sub>6</sub> solution using tetramethylsilane (TMS) as internal standard. Chemical shifts were recorded in ppm relative to TMS. Mass and purity were recorded on a LC-MSD-Trap-XCT (Agilent technologies Inc). All the reagents and chemicals used were from sigma Aldrich chemicals.

**2. General procedure for the synthesis of oxadiazoles:** To a solution of 3,3,3-trifluoropropanoic acid (1.2 eq) in DMF (10 v), CDI (2.0 eq) was added and stirred at room temperature for 2 h. After 2 h amidoxime (1.0 eq) was added and heated at 100 °C for 6 h. Reaction was monitored by TLC. After the completion of reaction, reaction mixture was extracted with ethyl acetate, washed with water and then brine, dried over Na<sub>2</sub>SO<sub>4</sub>. The solvent was removed under reduced pressure. Obtained crude was purified by silica gel column chromatography.

### 3. $^1\text{H}$ NMR and $^{13}\text{C}$ NMR of compounds 3a-3o

$^1\text{H}$  NMR of 3a

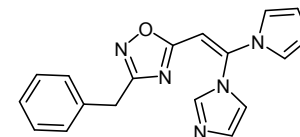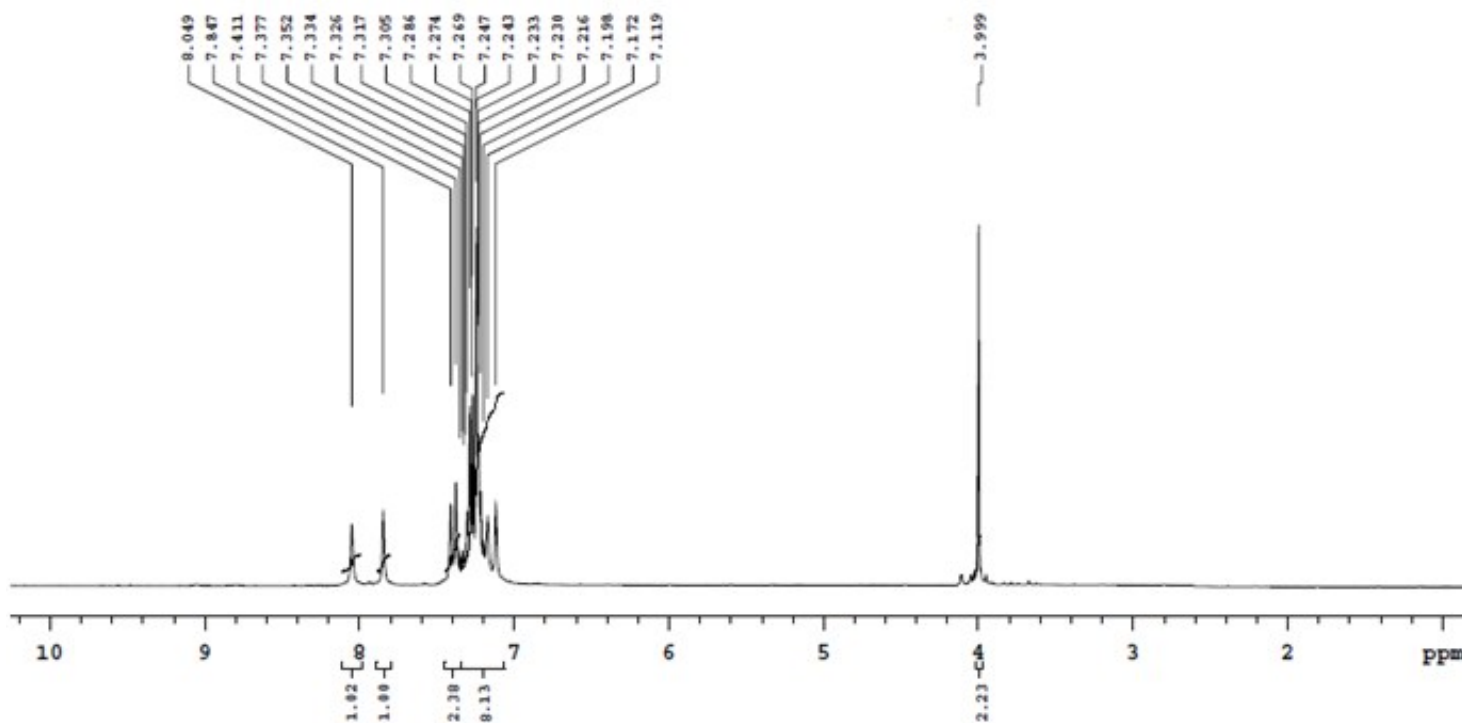

<sup>13</sup>C NMR of 3a

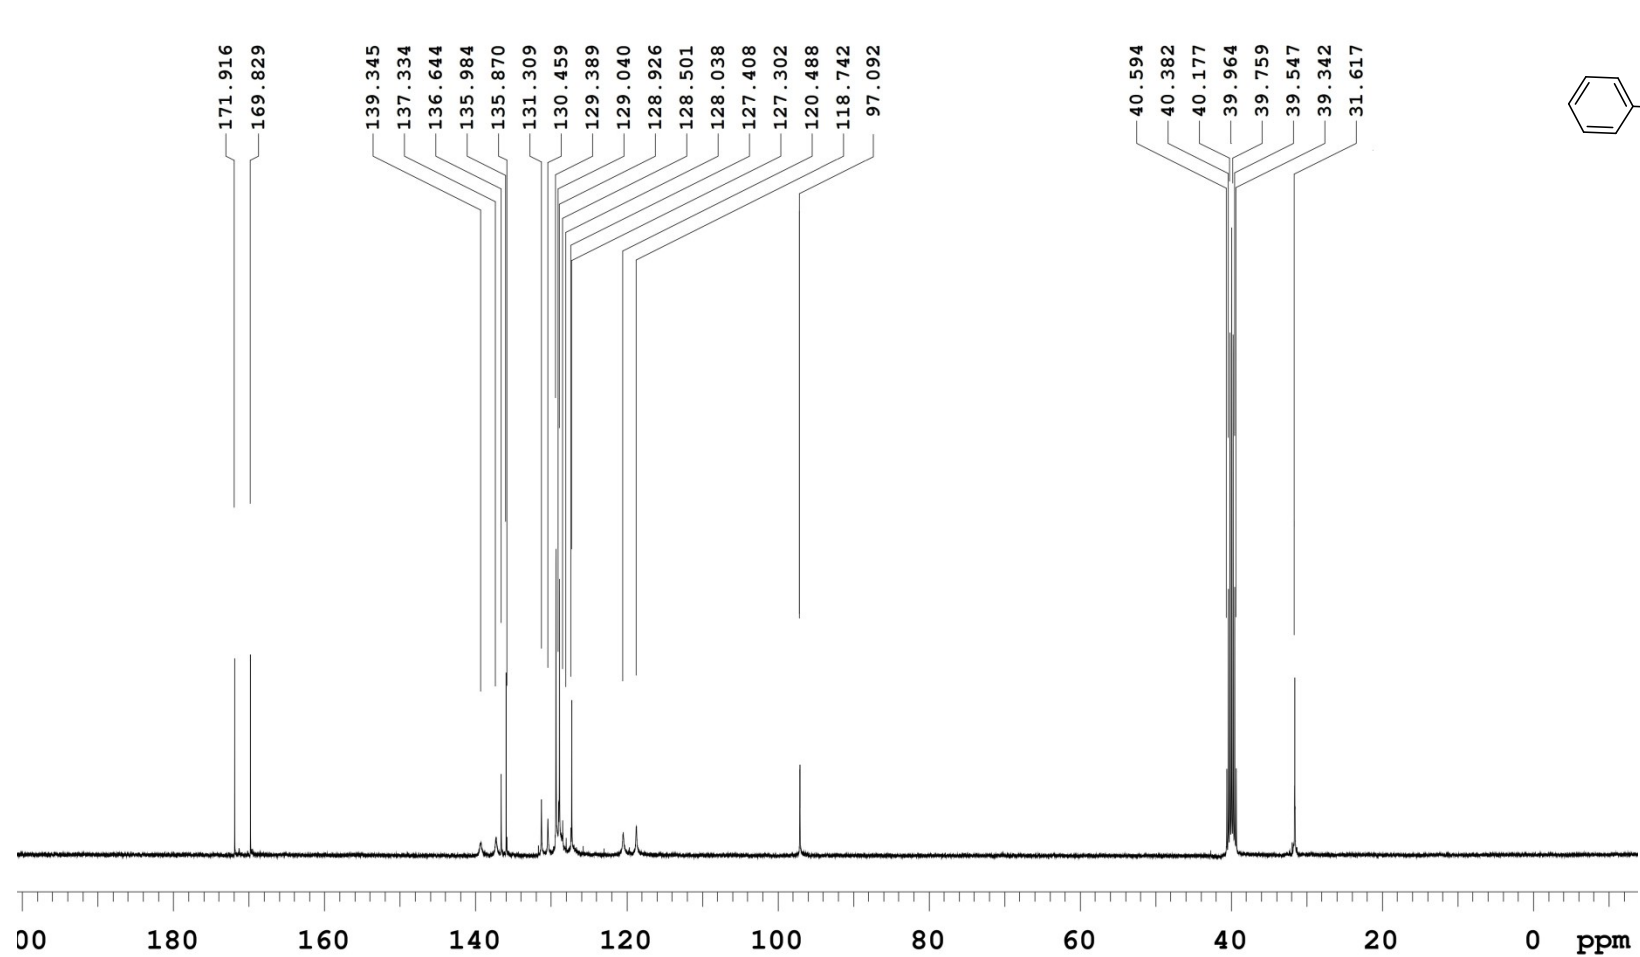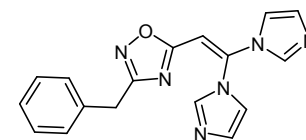

<sup>1</sup>H NMR of 3b

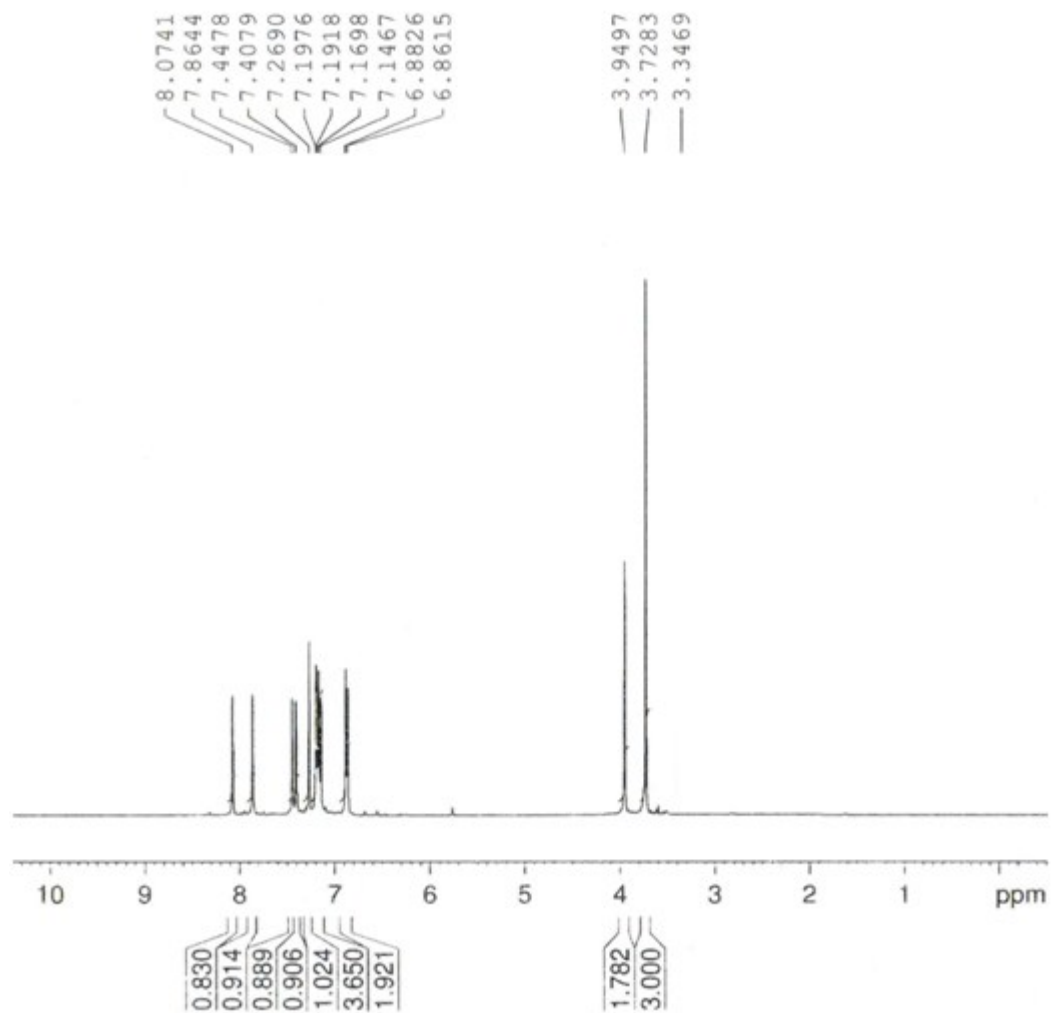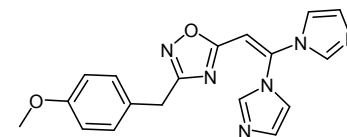

**<sup>13</sup>C NMR of 3b**

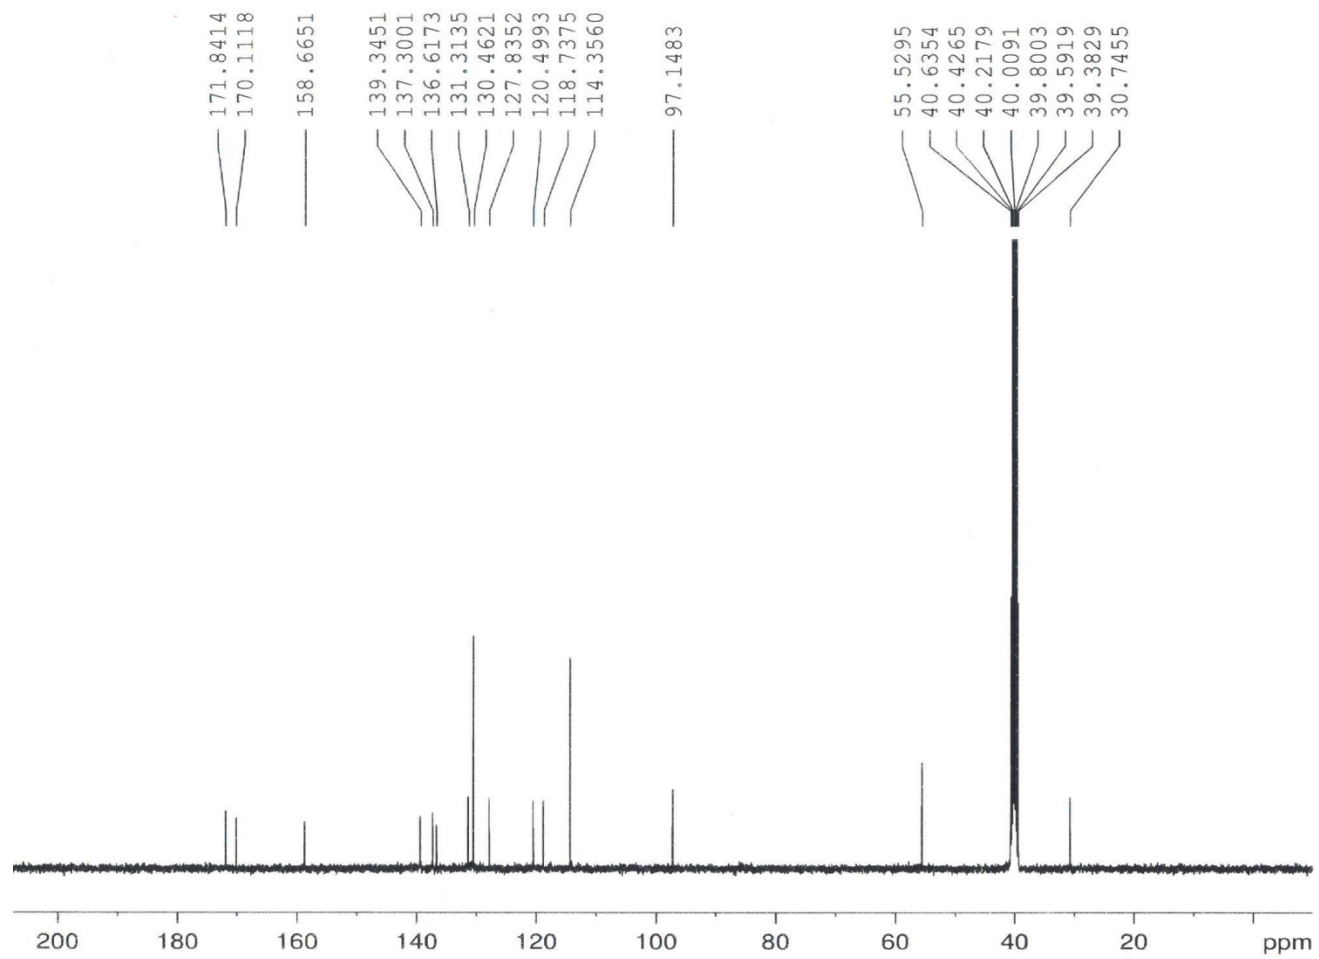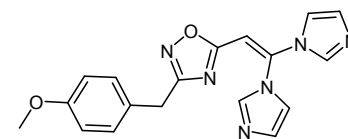

<sup>1</sup>H NMR of 3c

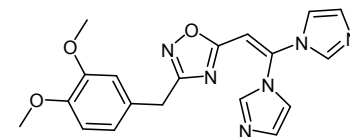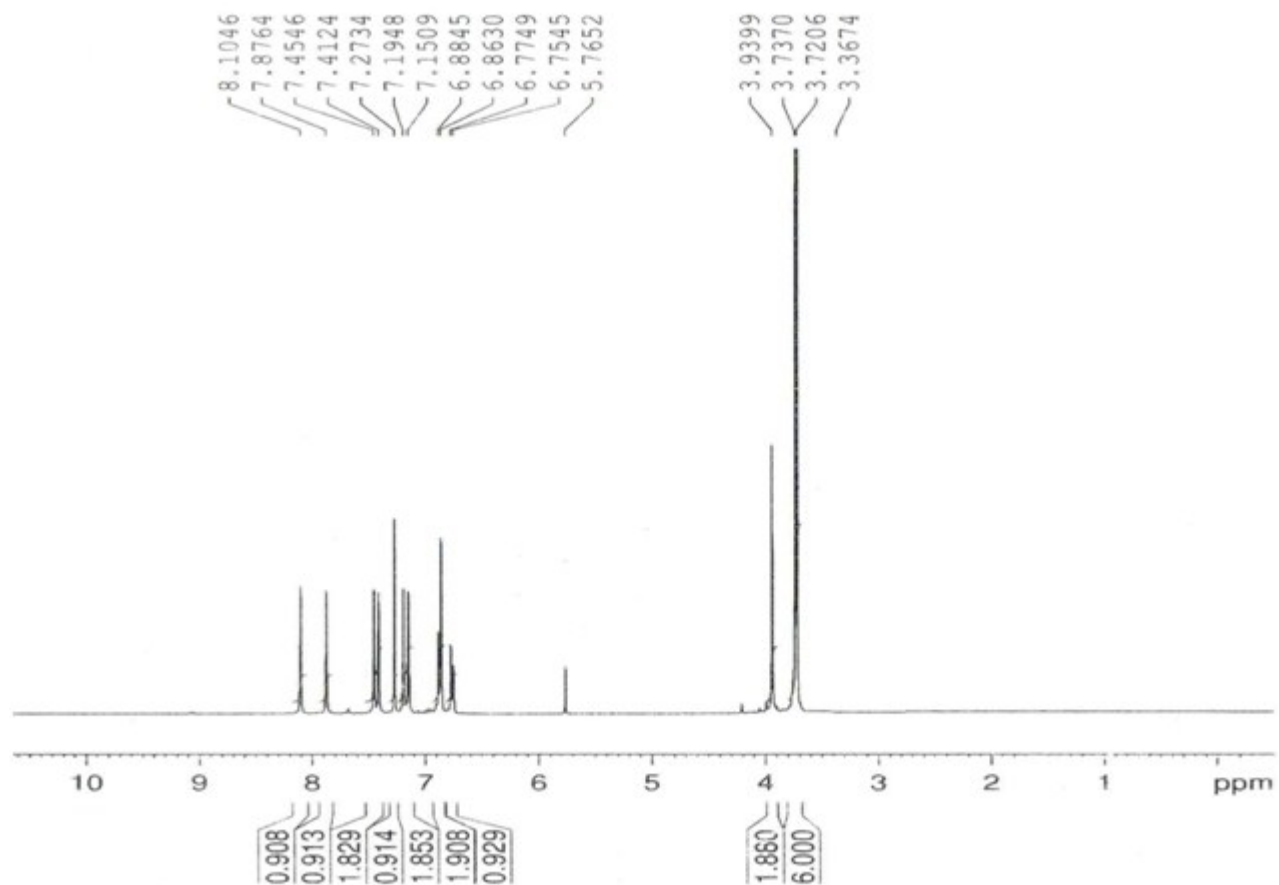

<sup>13</sup>C NMR of 3c

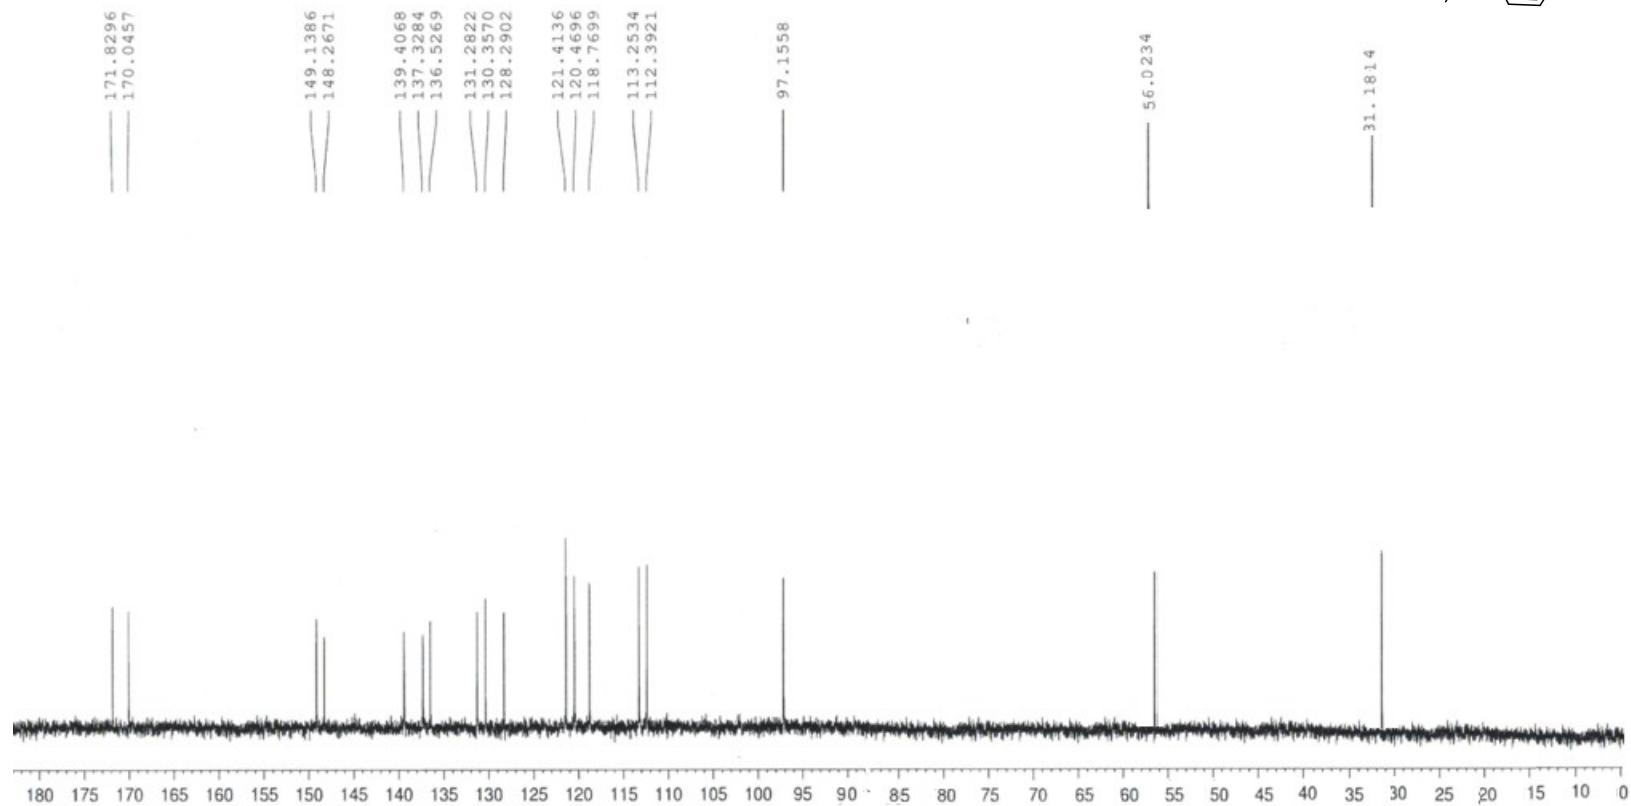



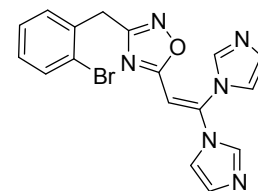

$^1\text{H}$  NMR of 3d

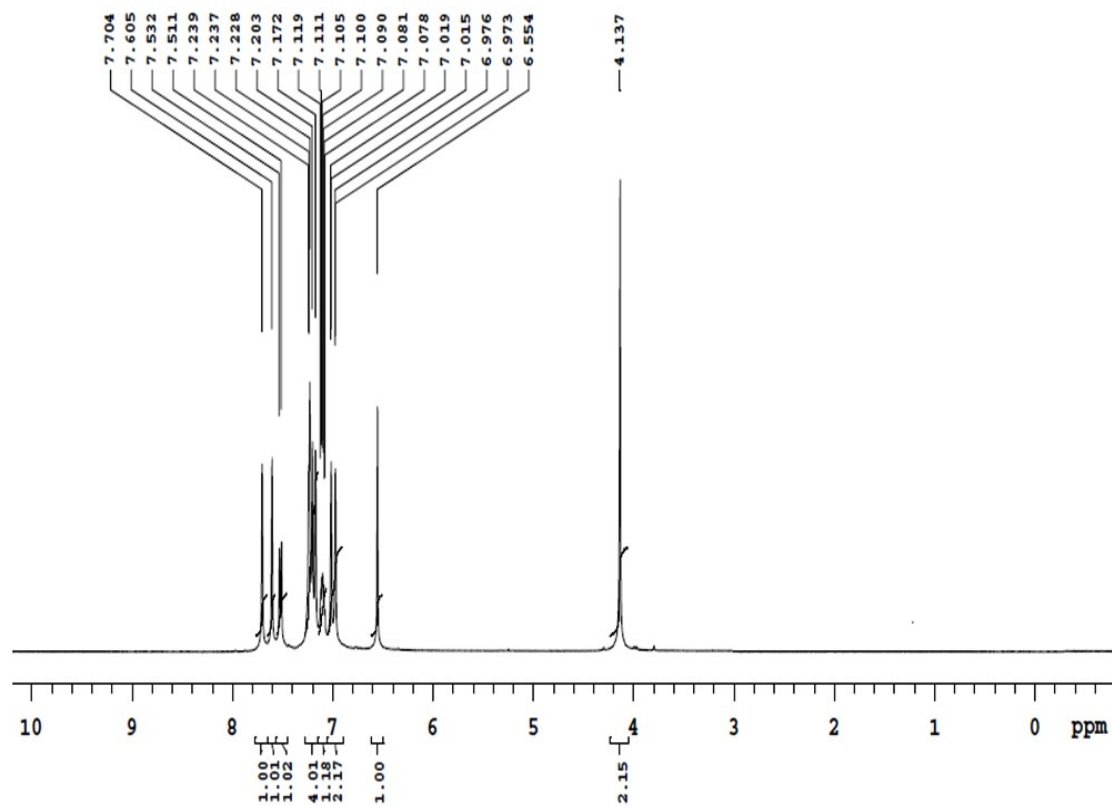

<sup>13</sup>C NMR of 3d

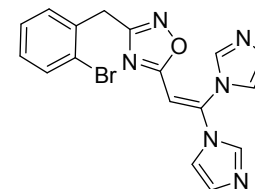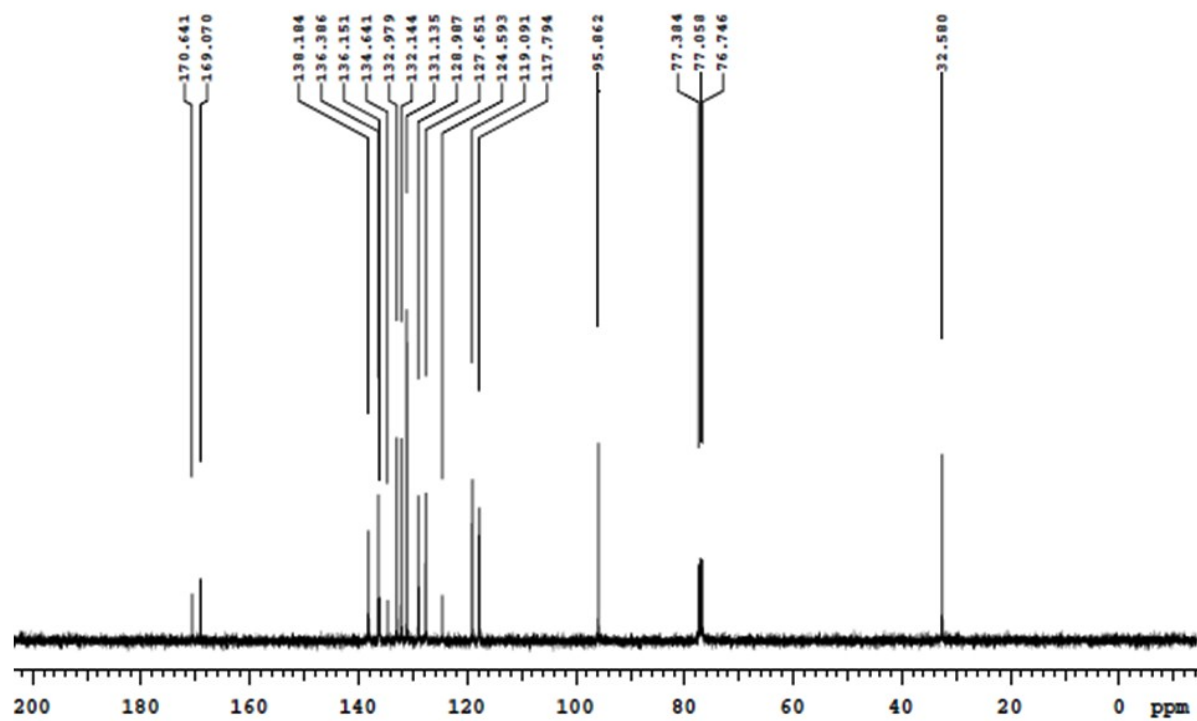

<sup>1</sup>H NMR of 3e

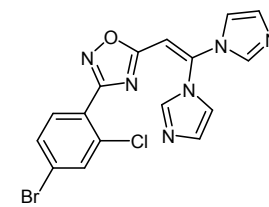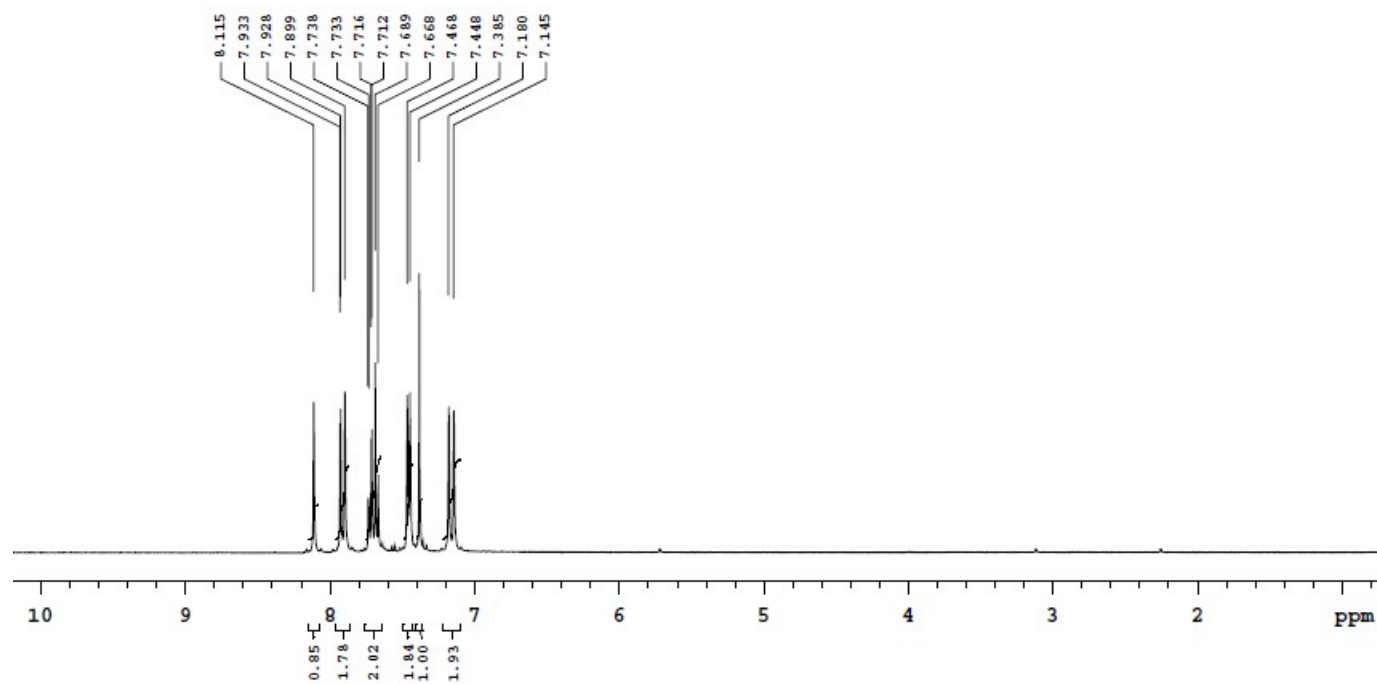

<sup>1</sup>H NMR of 3e

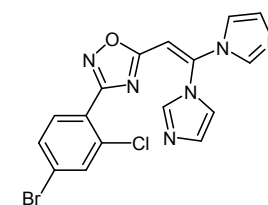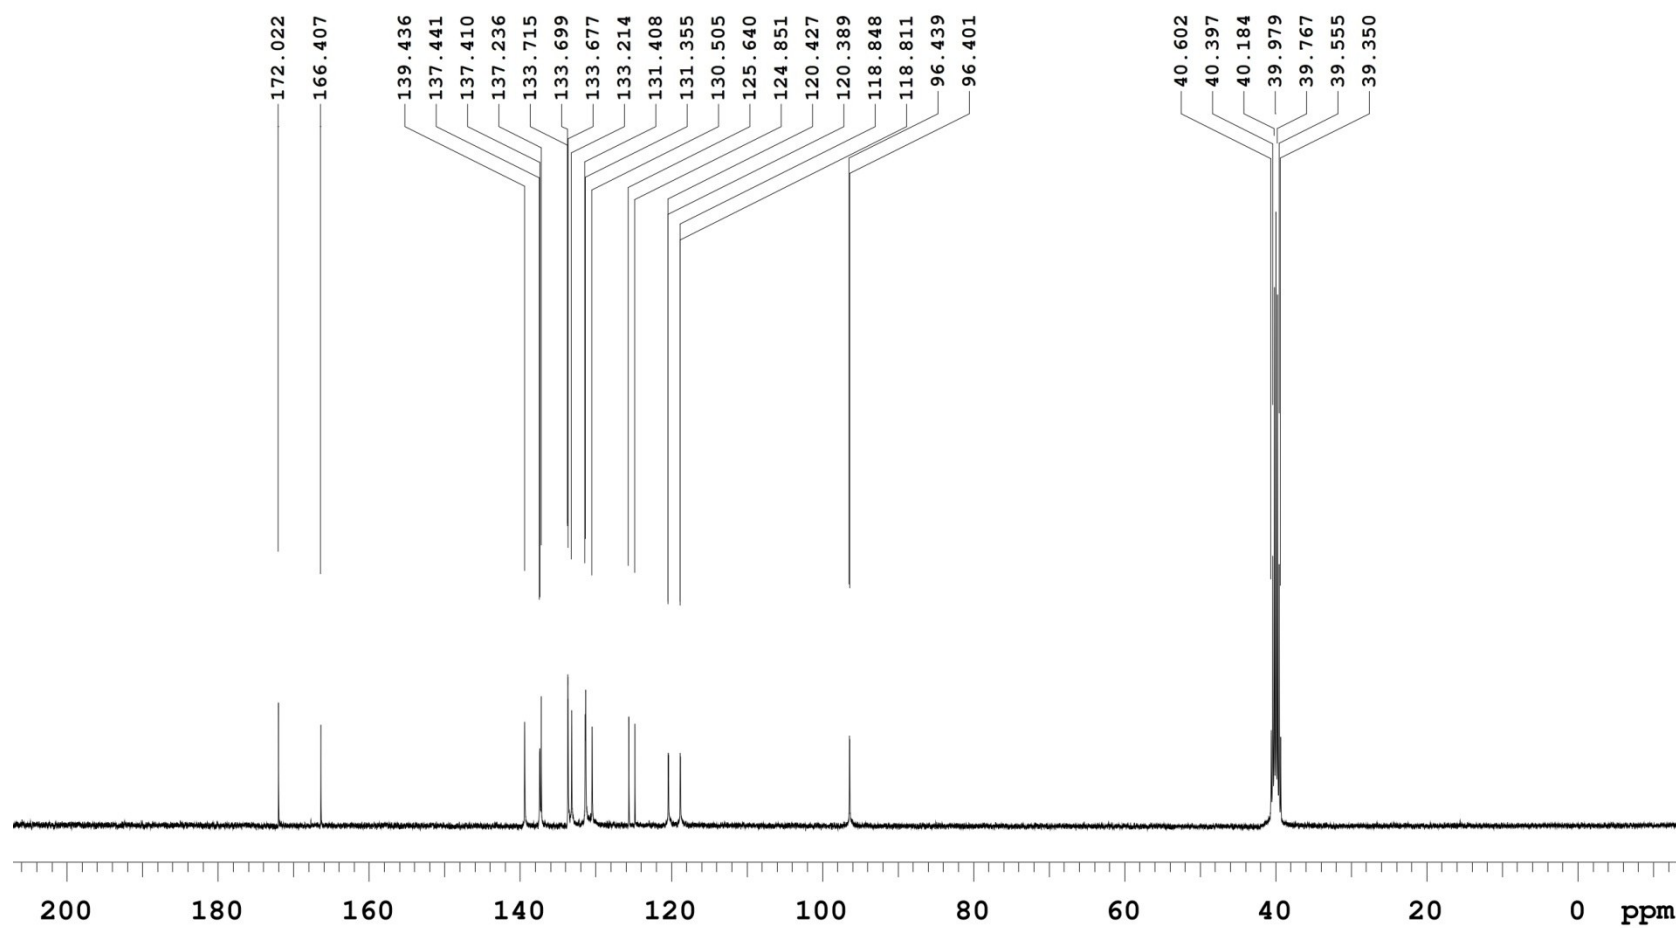

<sup>13</sup>C NMR of 3f

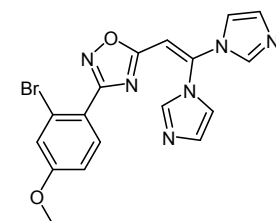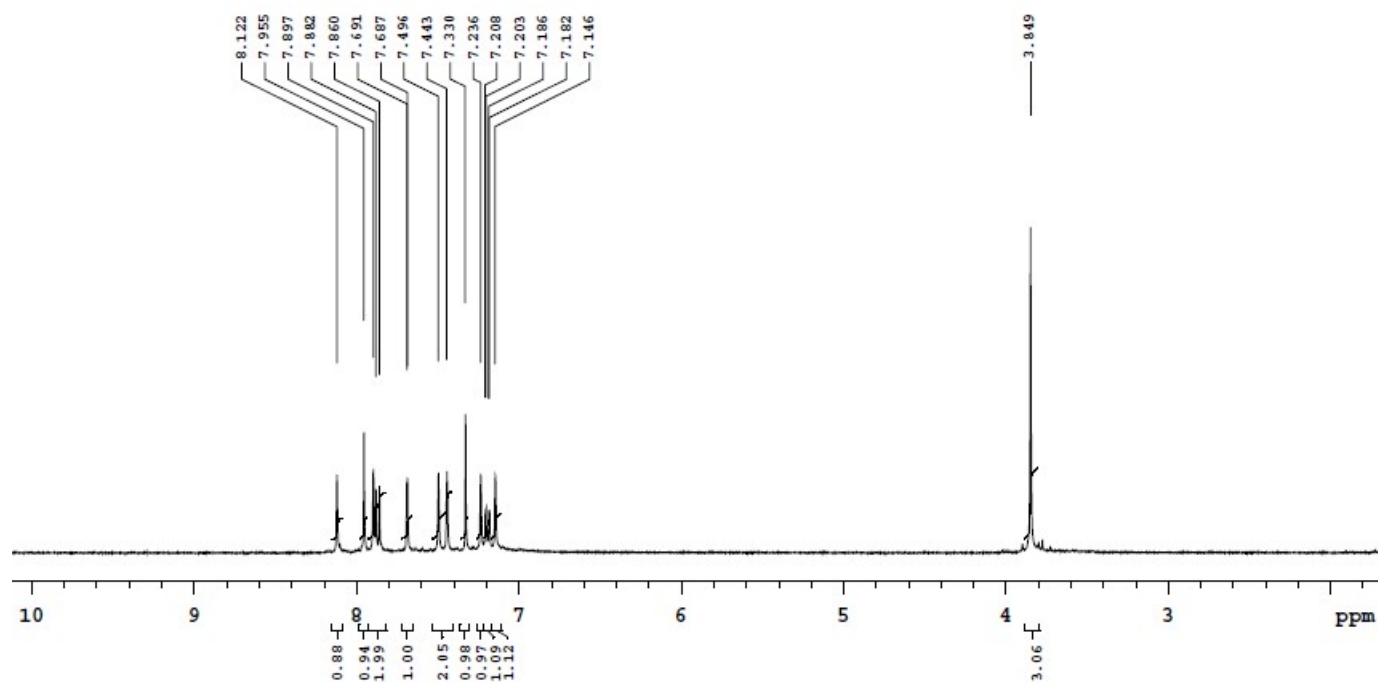

<sup>13</sup>C NMR of 3f

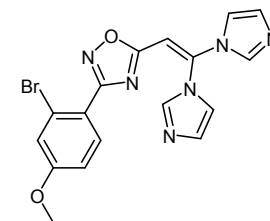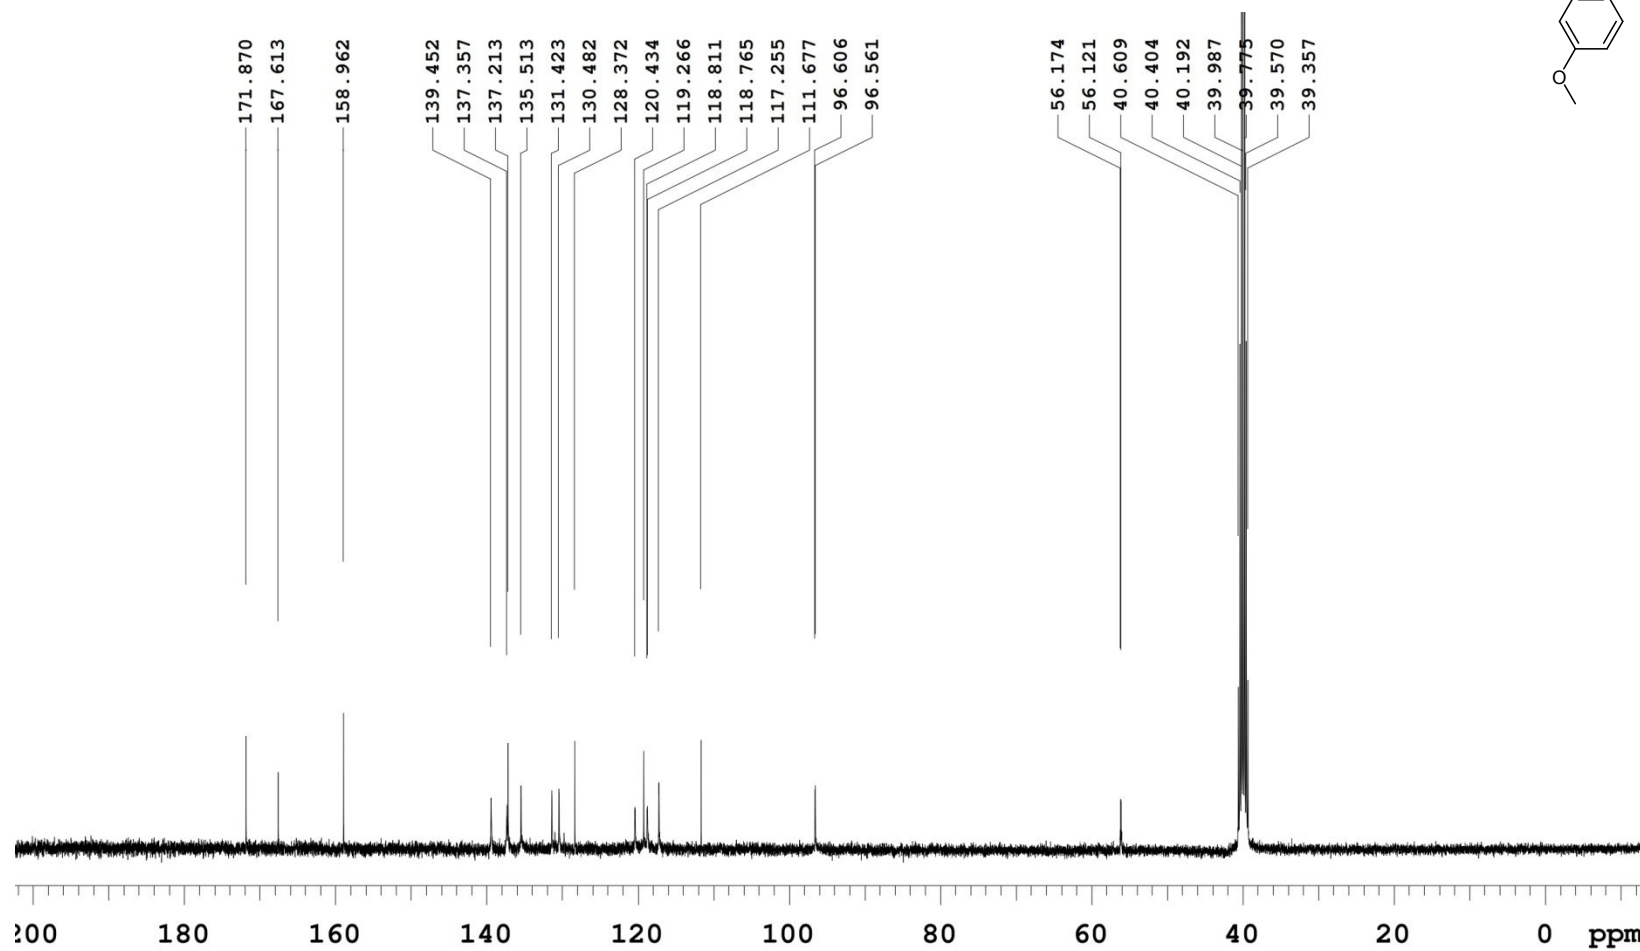

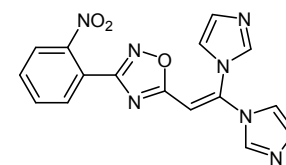

$^1\text{H}$  NMR of 3g

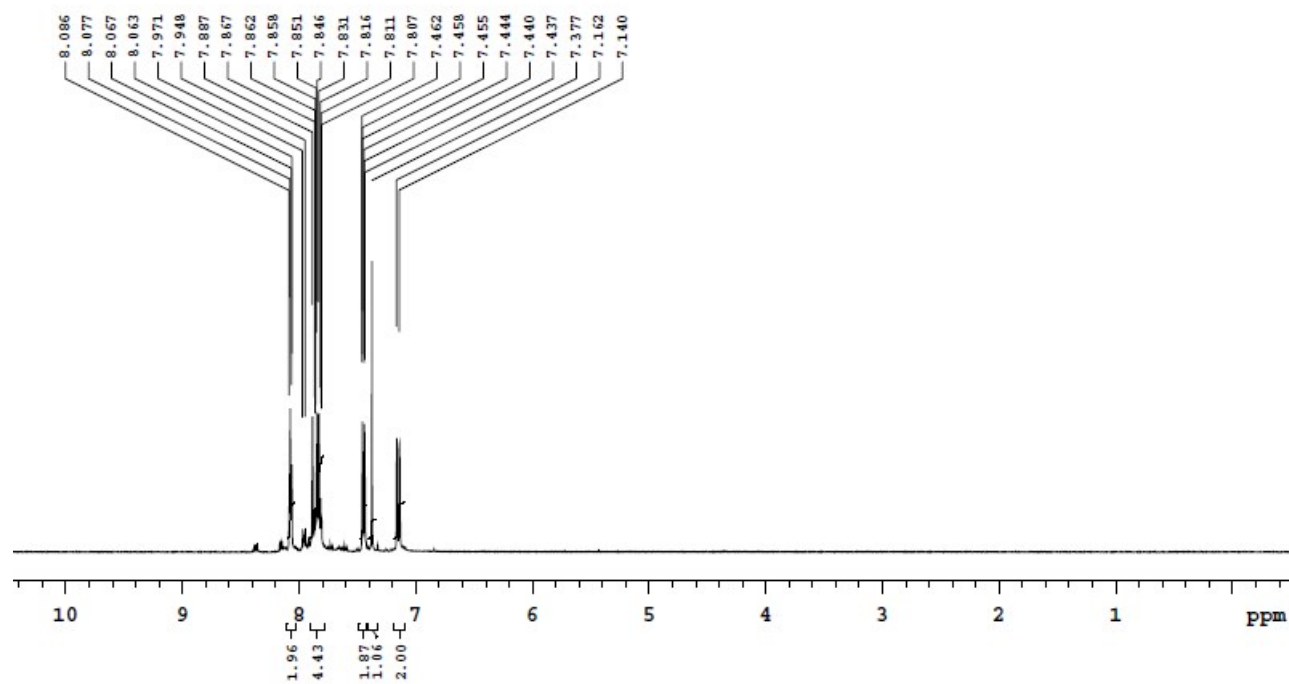

<sup>13</sup>C NMR of 3g

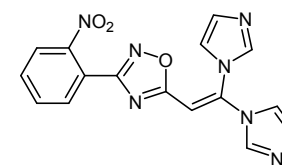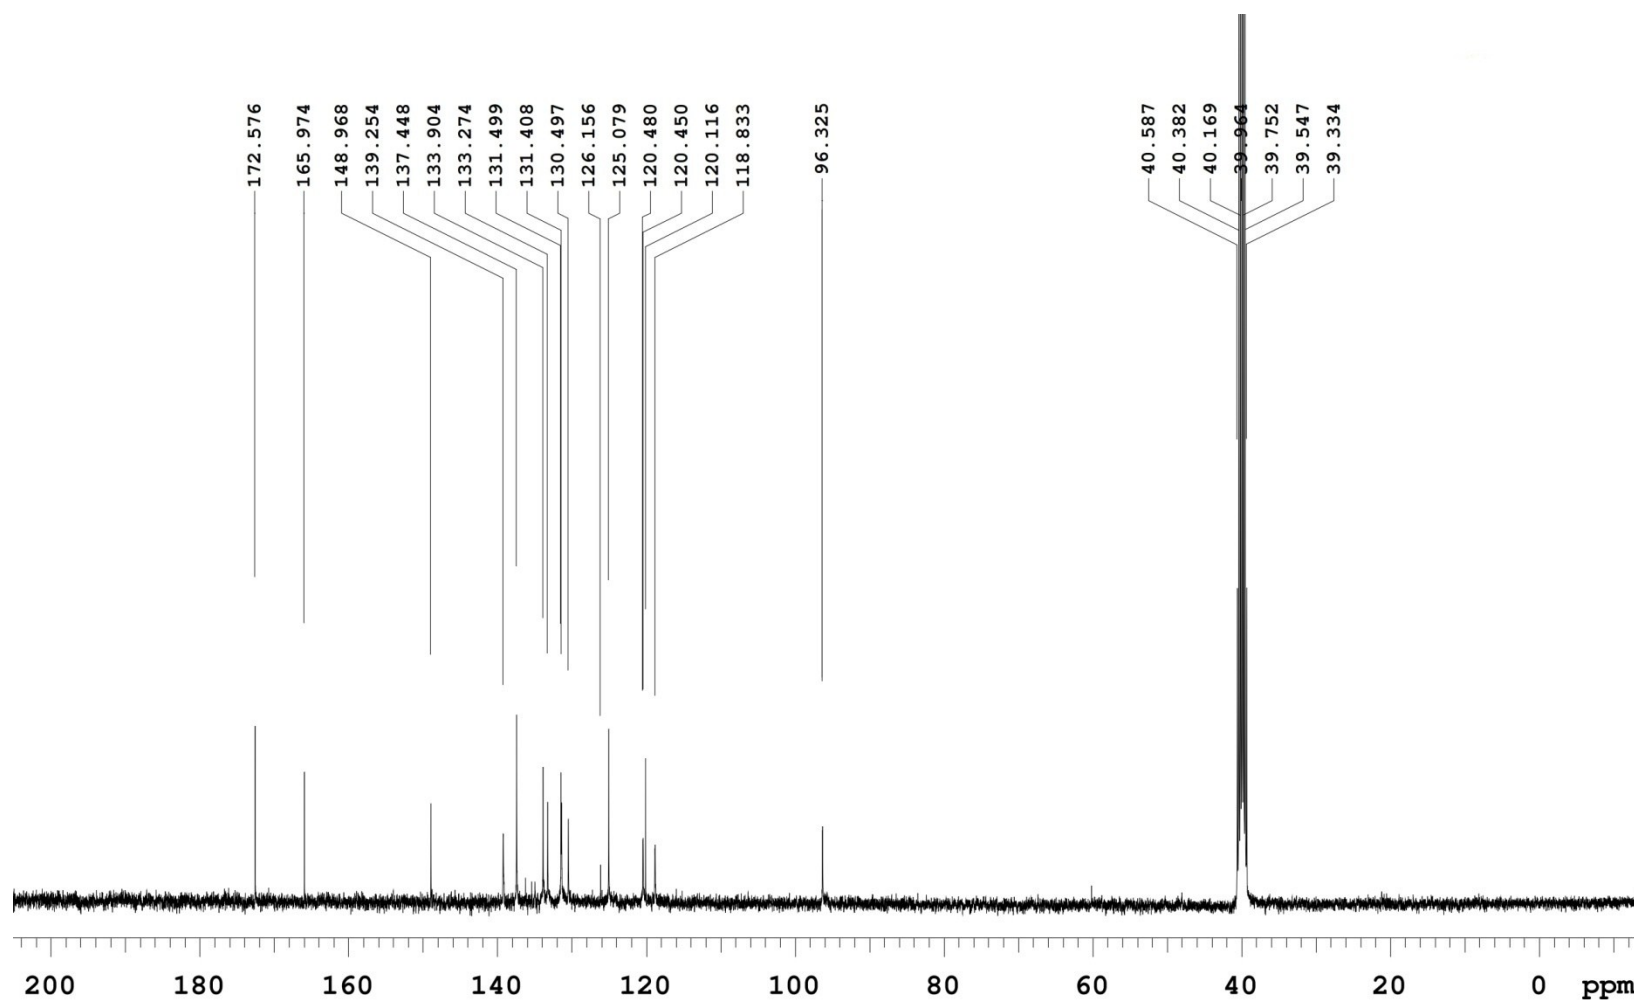



<sup>1</sup>H NMR of 3h

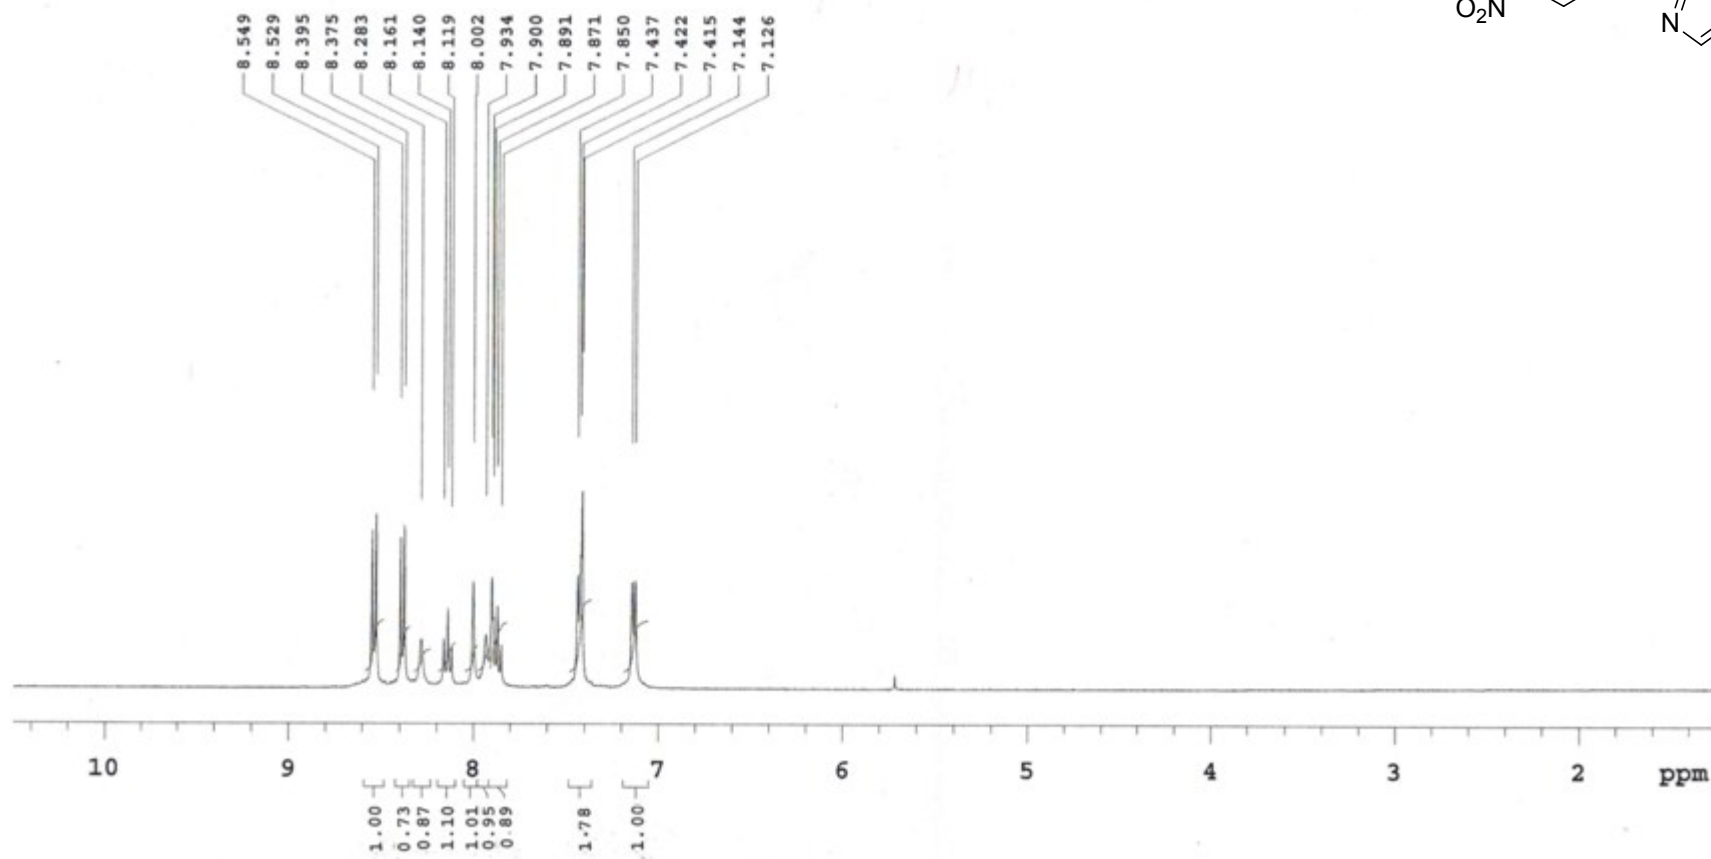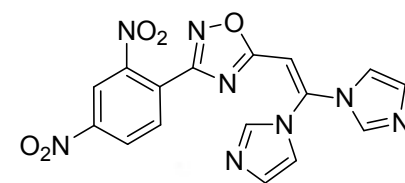

<sup>1</sup>H NMR of 3h

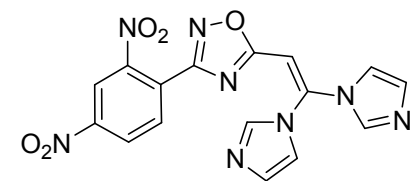

<sup>1</sup>H NMR of 3i

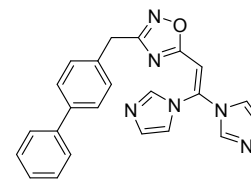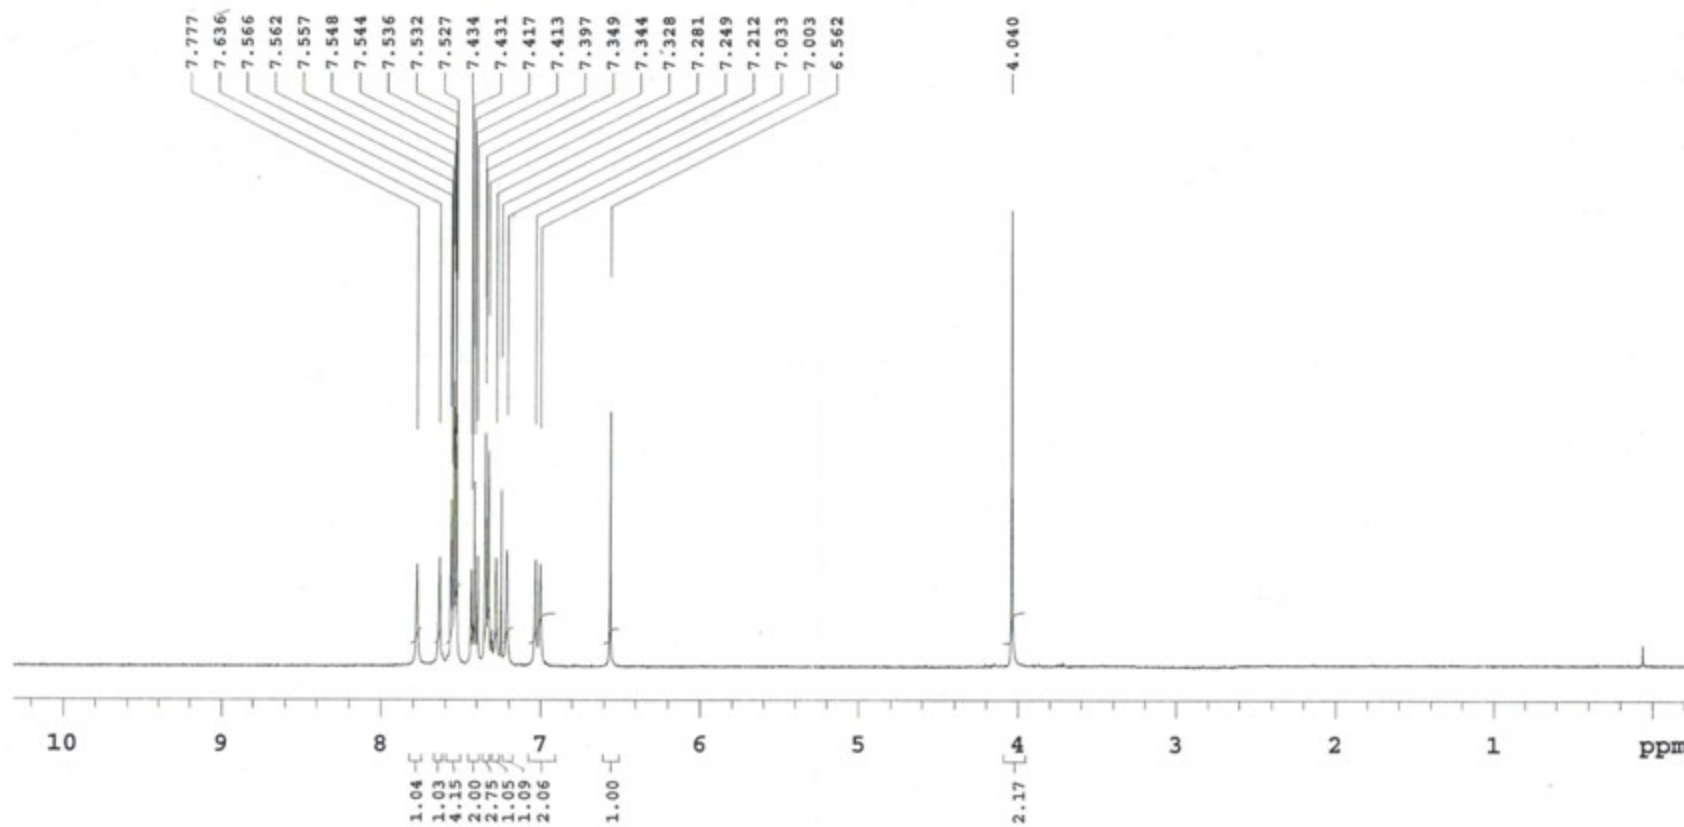

<sup>13</sup>C NMR of 3i

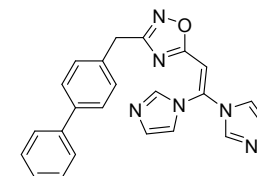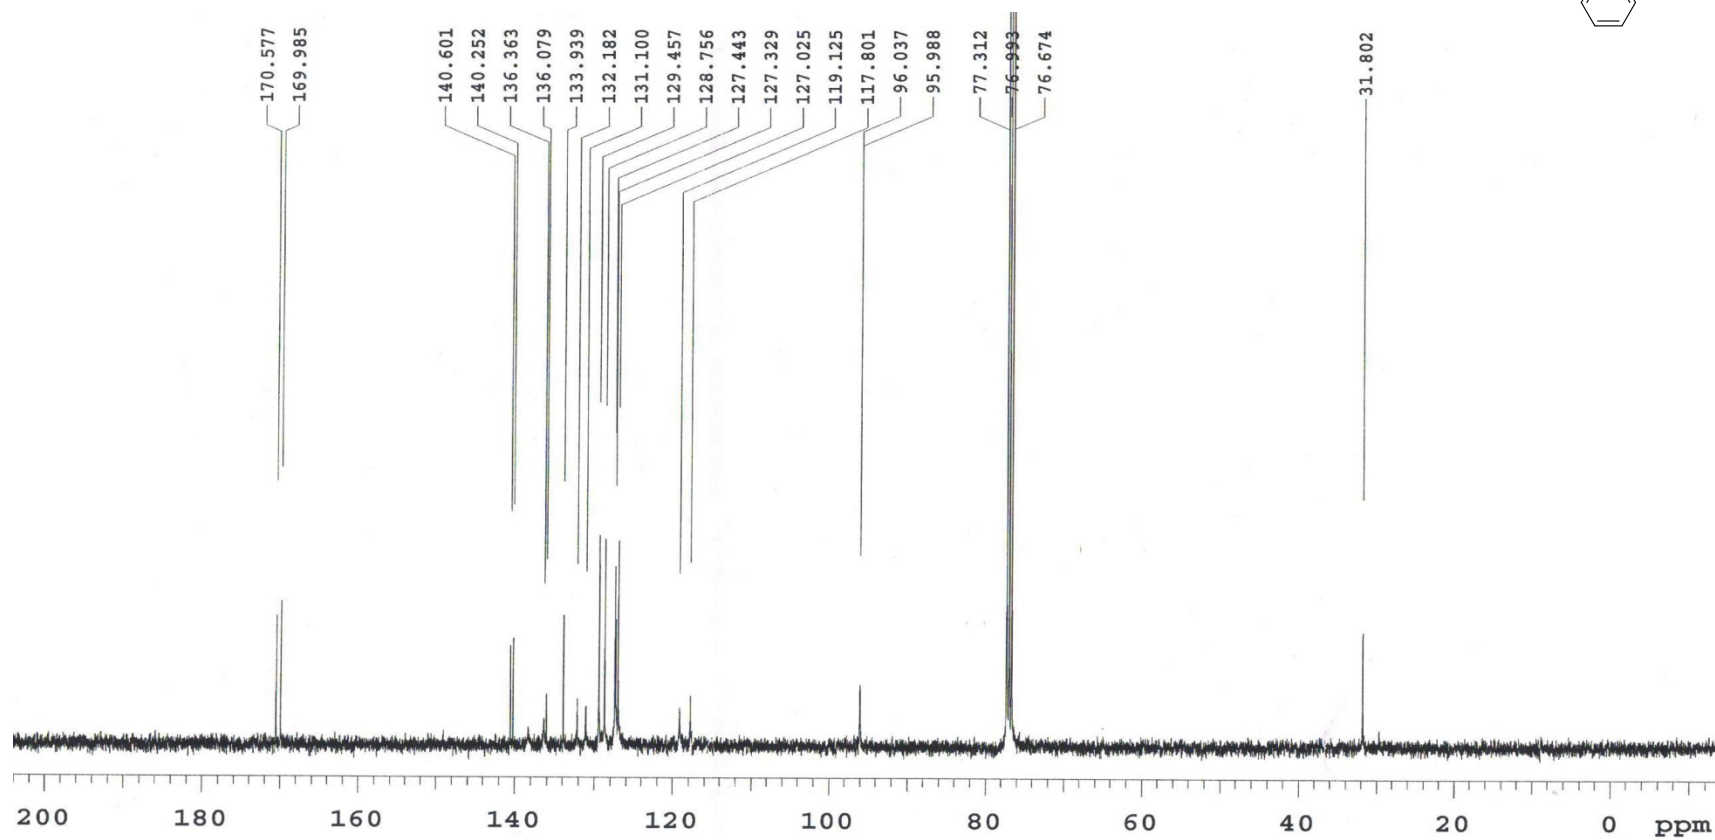

<sup>1</sup>H NMR of 3j

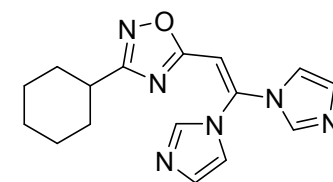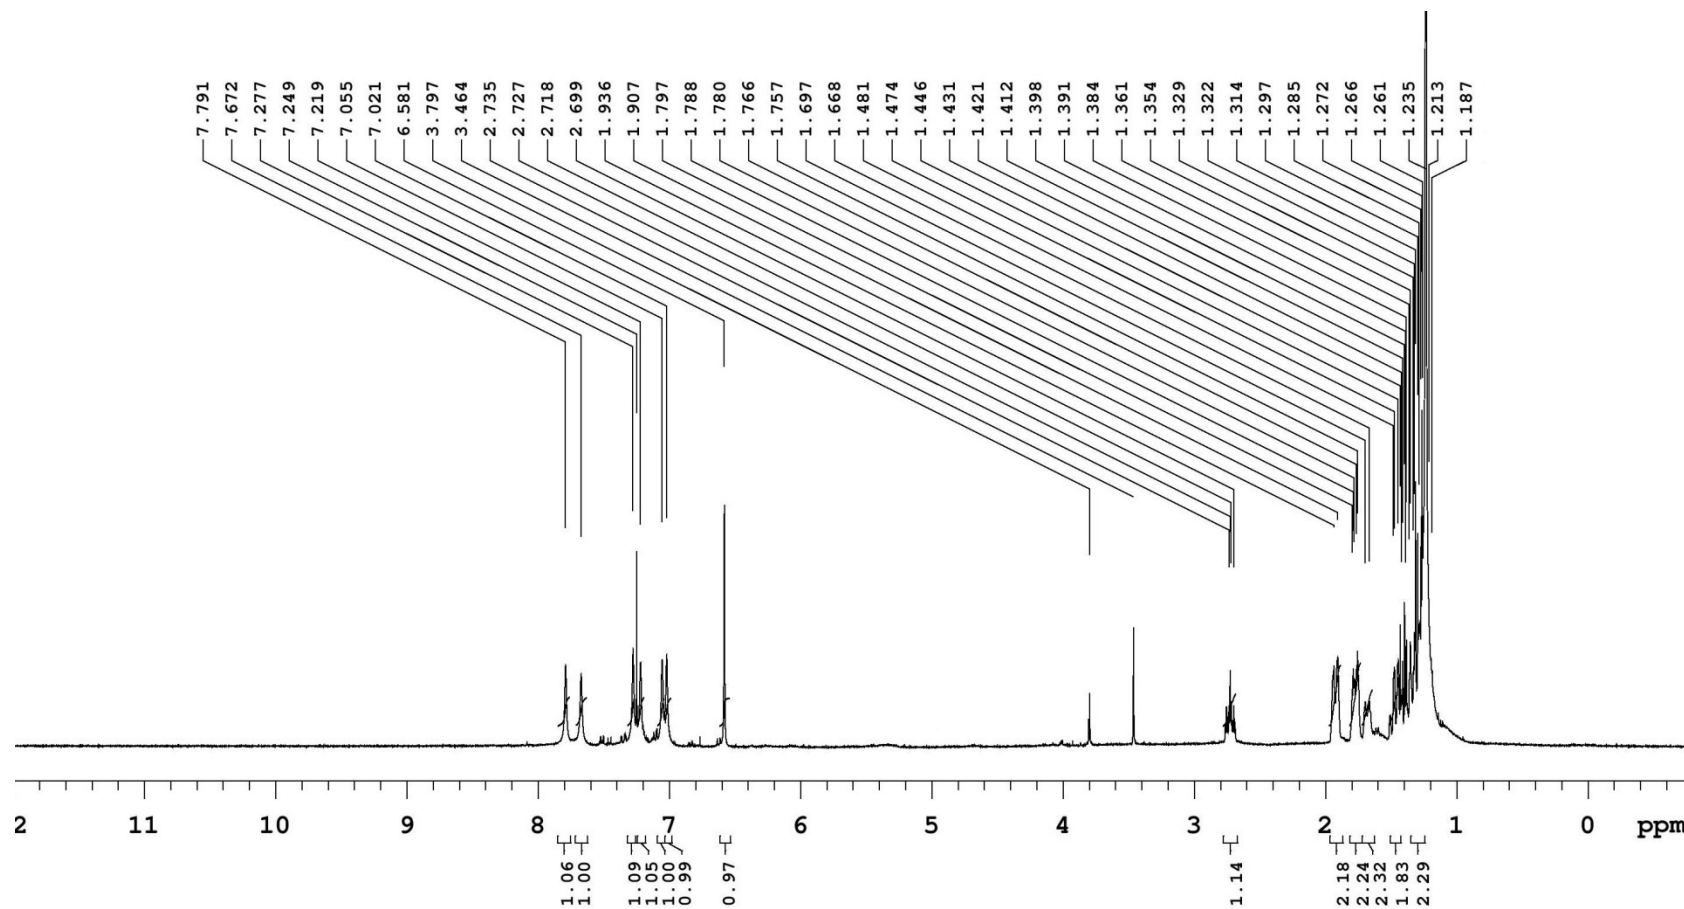

<sup>13</sup>C NMR of 3j

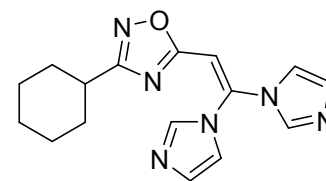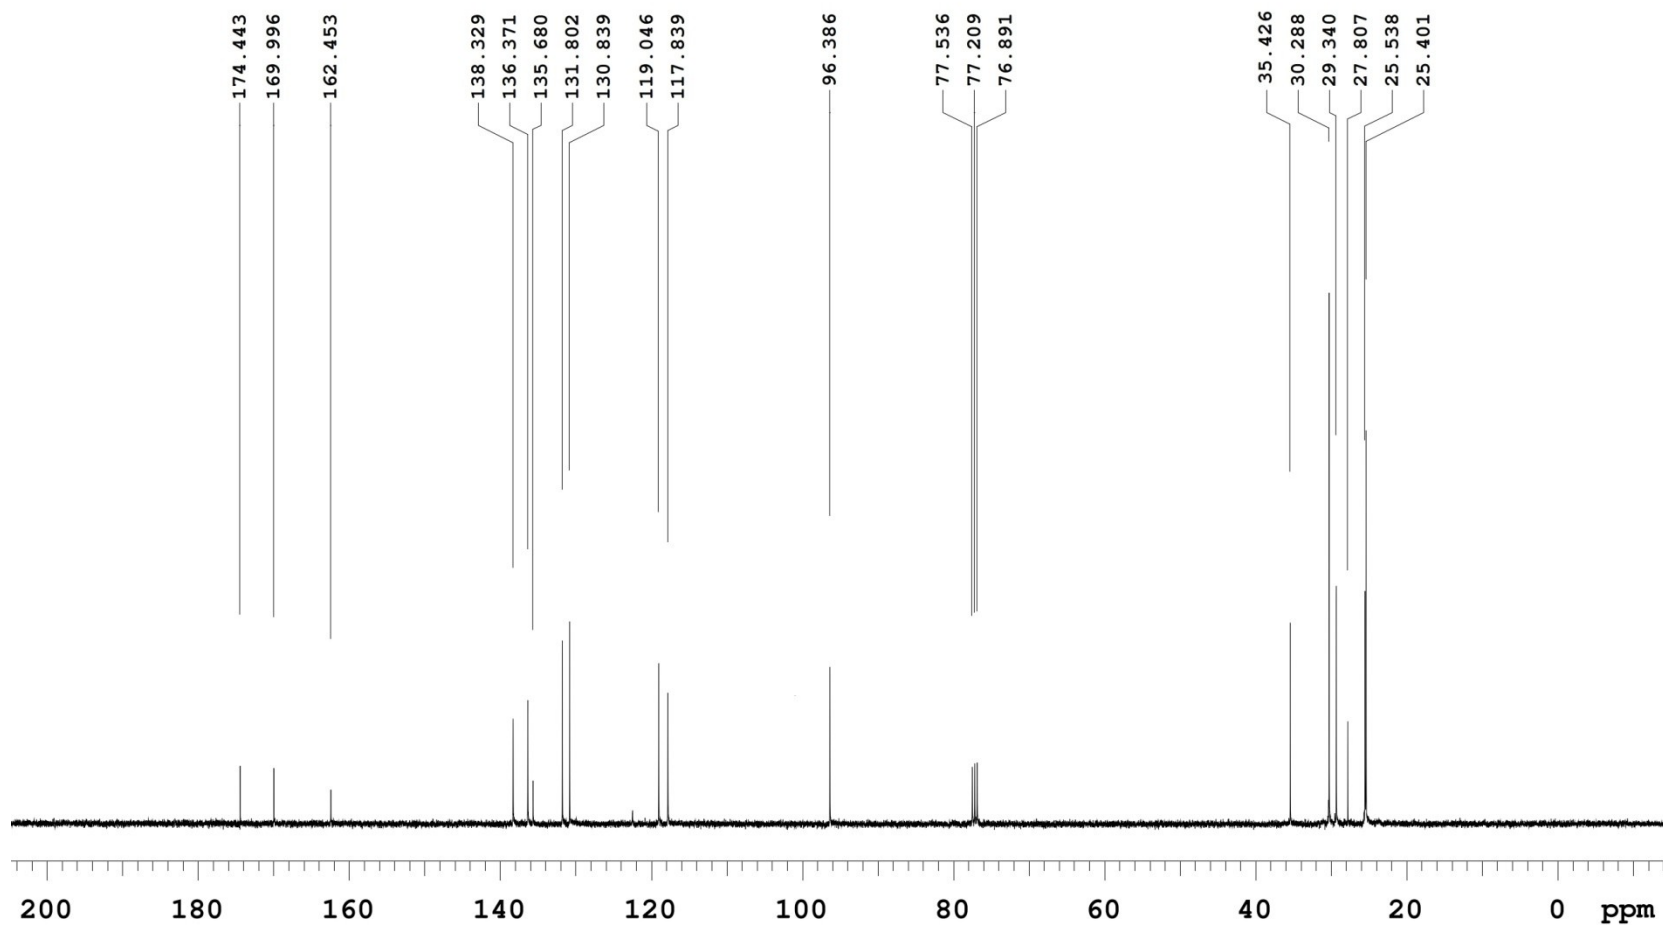

**<sup>1</sup>H NMR of 3k**

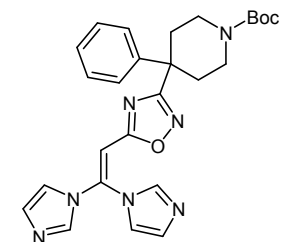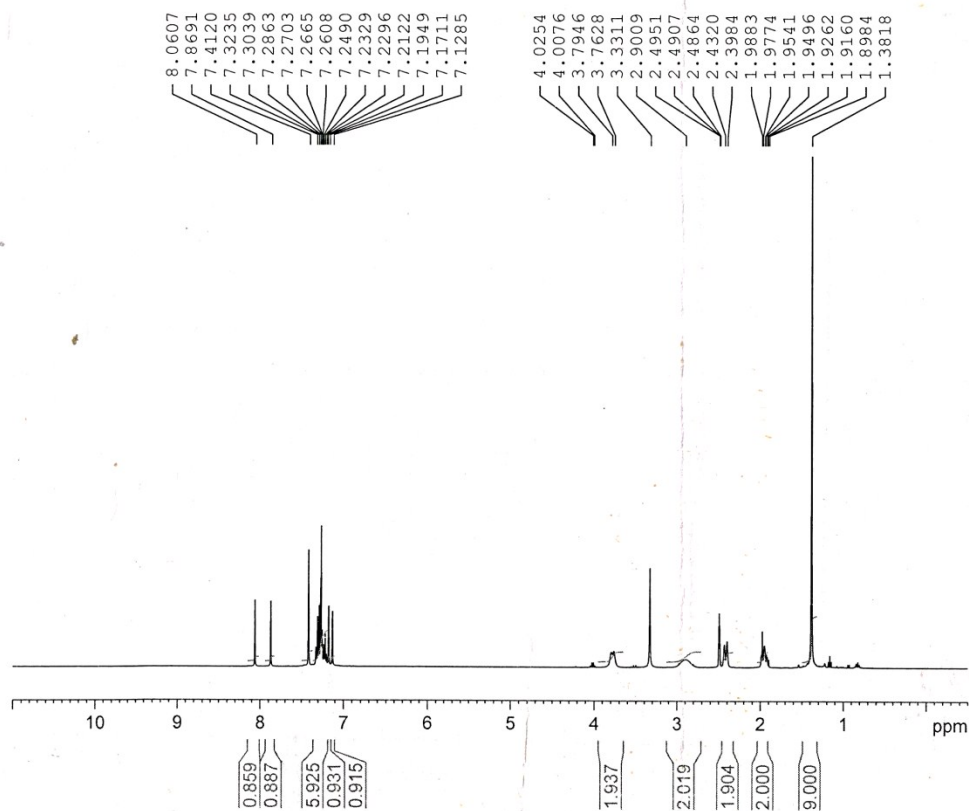

Current Data Parameters  
NAME GF907031-9241414  
EXPNO 1  
PROCNO 1

F2 - Acquisition Parameters  
Date\_ 20091109  
Time\_ 12.14  
INSTRUM spect  
PROBHD 5 mm PABBO BB-  
PULPROG zg30  
TD 32768  
SOLVENT DMSO  
NS 16  
DS 2  
SWH 9615.385 Hz  
FIDRES 0.293438 Hz  
AQ 1.7039860 sec  
RG 256  
DW 52.000 usec  
DE 6.00 usec  
TE 294.5 K  
D1 2.00000000 sec  
TD0 1

===== CHANNEL f1 =====  
NUC1 1H  
P1 14.00 usec  
PL1 0.00 dB  
SFO1 400.1534013 MHz

F2 - Processing parameters  
SI 32768  
SF 400.1500000 MHz  
WDW EM  
SSB 0  
LB 0.30 Hz  
GB 0  
PC 1.00

<sup>13</sup>C NMR of 3k

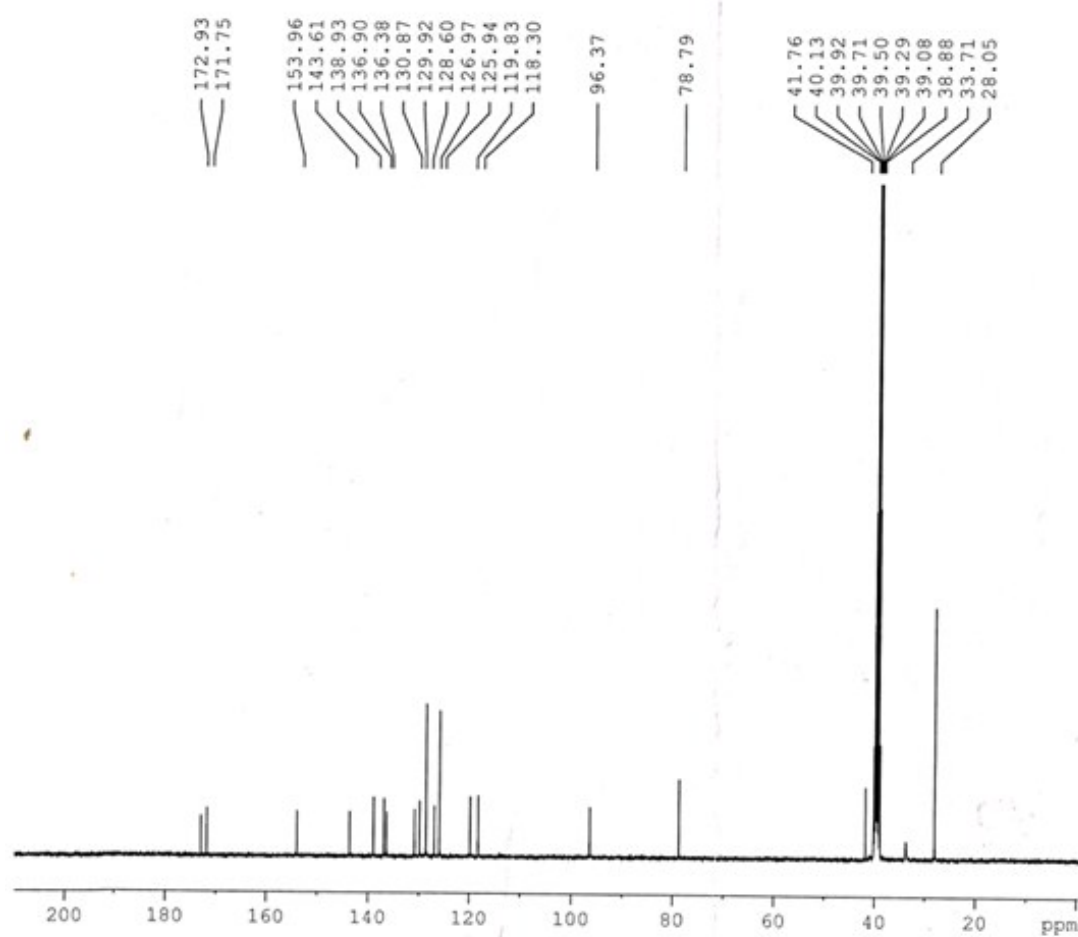

Current Data Parameters  
NAME GF907031-9241414  
EXPNO 2  
PROCNO 1

F2 - Acquisition Parameters  
Date\_ 20091109  
Time\_ 13.10  
INSTRUM spect  
PROBHD 5 mm PABBO BB-  
PULPROG zgpg30  
TD 32768  
SOLVENT DMSO  
NS 1424  
DS 4  
SWH 29761.904 Hz  
FIDRES 0.908261 Hz  
AQ 0.5505524 sec  
RG 114  
DW 16.800 usec  
DE 6.00 usec  
TE 294.9 K  
D1 2.00000000 sec  
d11 0.03000000 sec  
DELTA 1.89999998 sec  
TDO 1

\*\*\*\*\* CHANNEL f1 \*\*\*\*\*  
NUC1 13C  
P1 7.13 usec  
PL1 -3.00 dB  
SFO1 100.6298721 MHz

\*\*\*\*\* CHANNEL f2 \*\*\*\*\*  
CPDPRG2 waltz16  
NUC2 1H  
PCPD2 80.00 usec  
PL12 15.14 dB  
PL13 15.00 dB  
PL2 0.00 dB  
SFO2 400.1516006 MHz

F2 - Processing parameters  
SI 32768  
SF 100.6178437 MHz  
WDW EM  
SSB 0  
LB 1.00 Hz  
GB 0  
PC 1.40

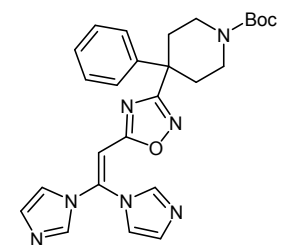



<sup>1</sup>H NMR of 3l

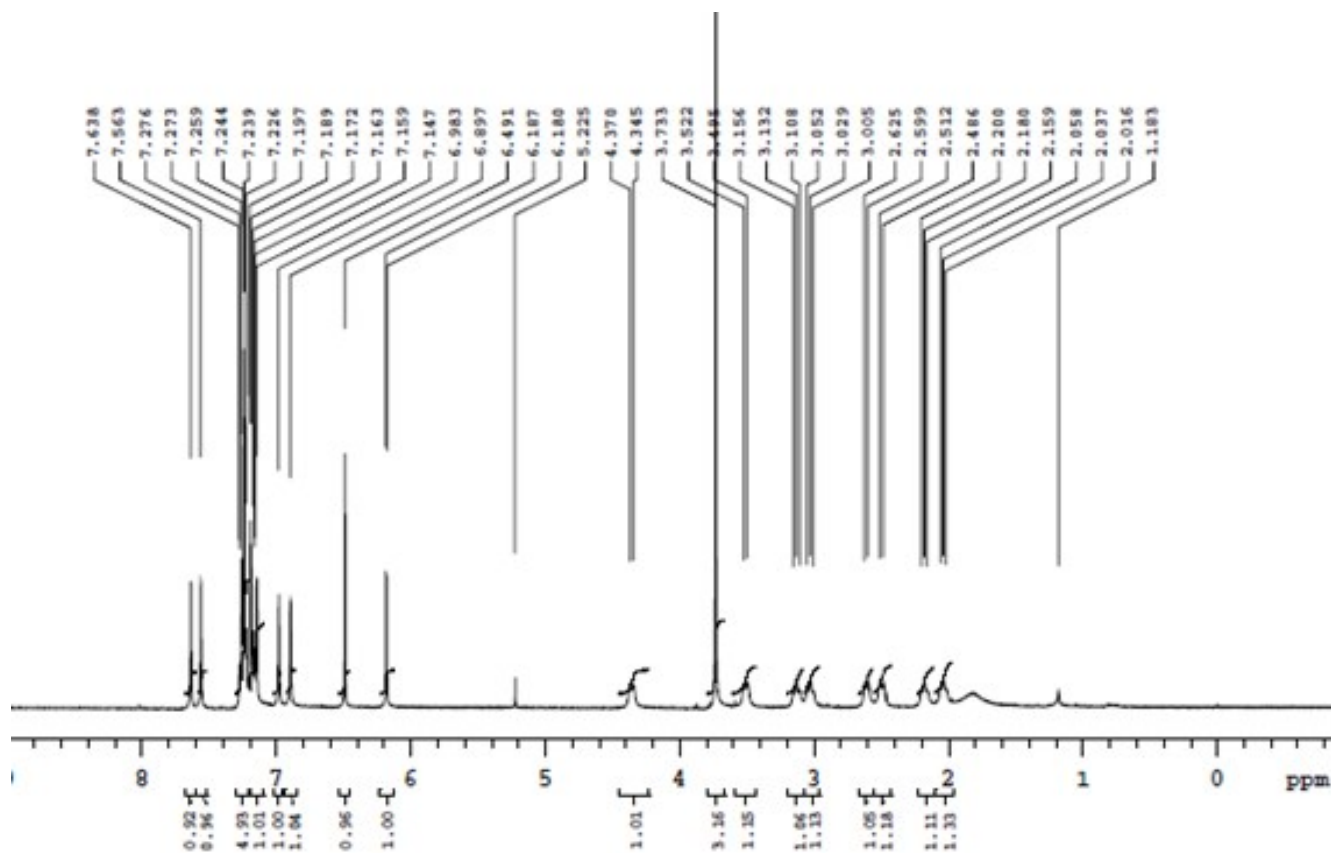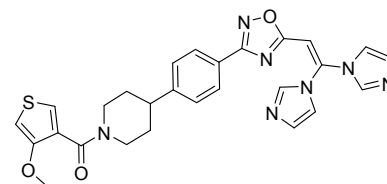

<sup>13</sup>C NMR of 3I

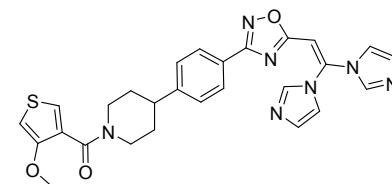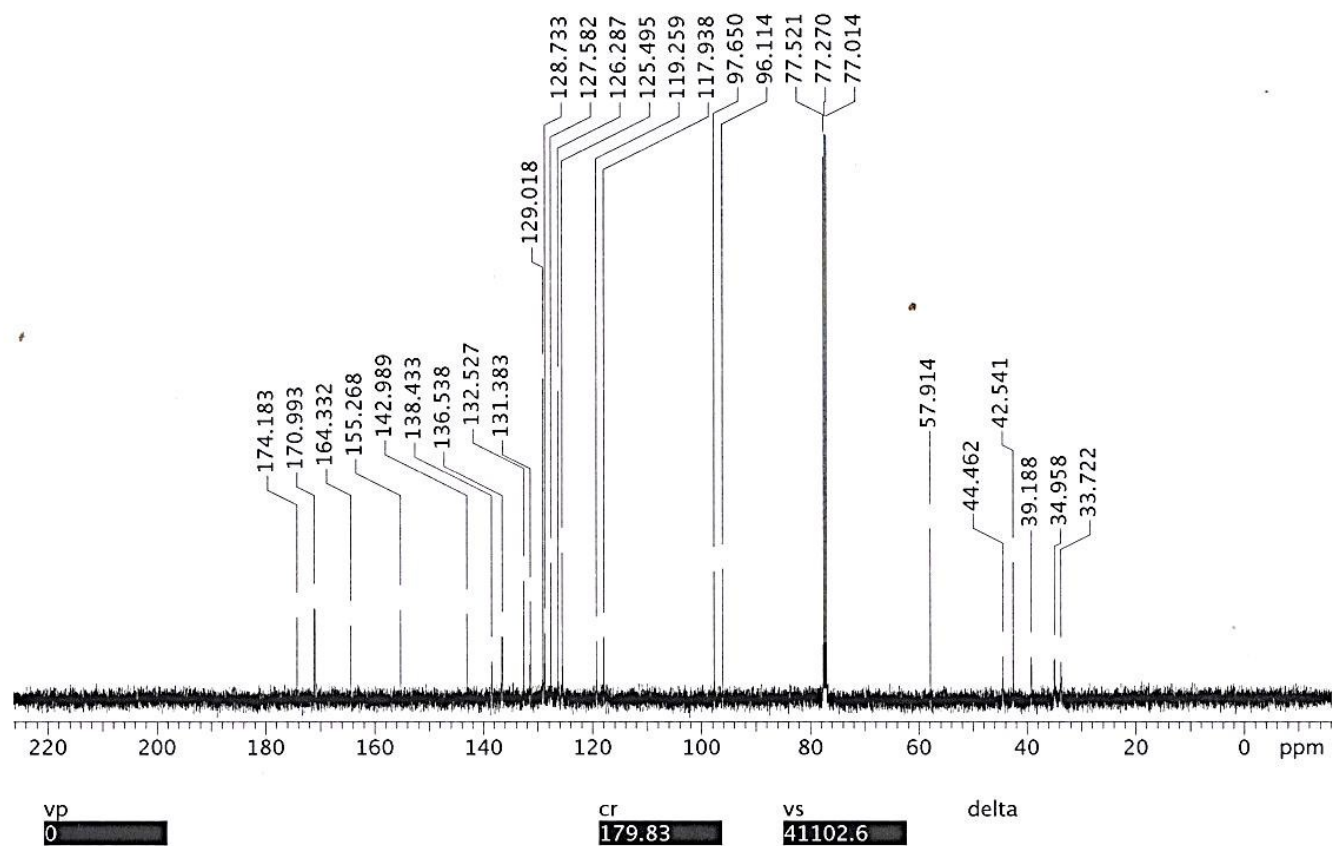

<sup>1</sup>H NMR of 3m

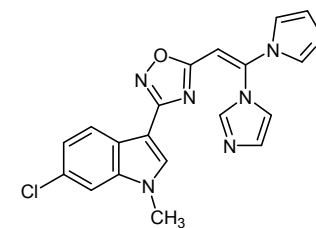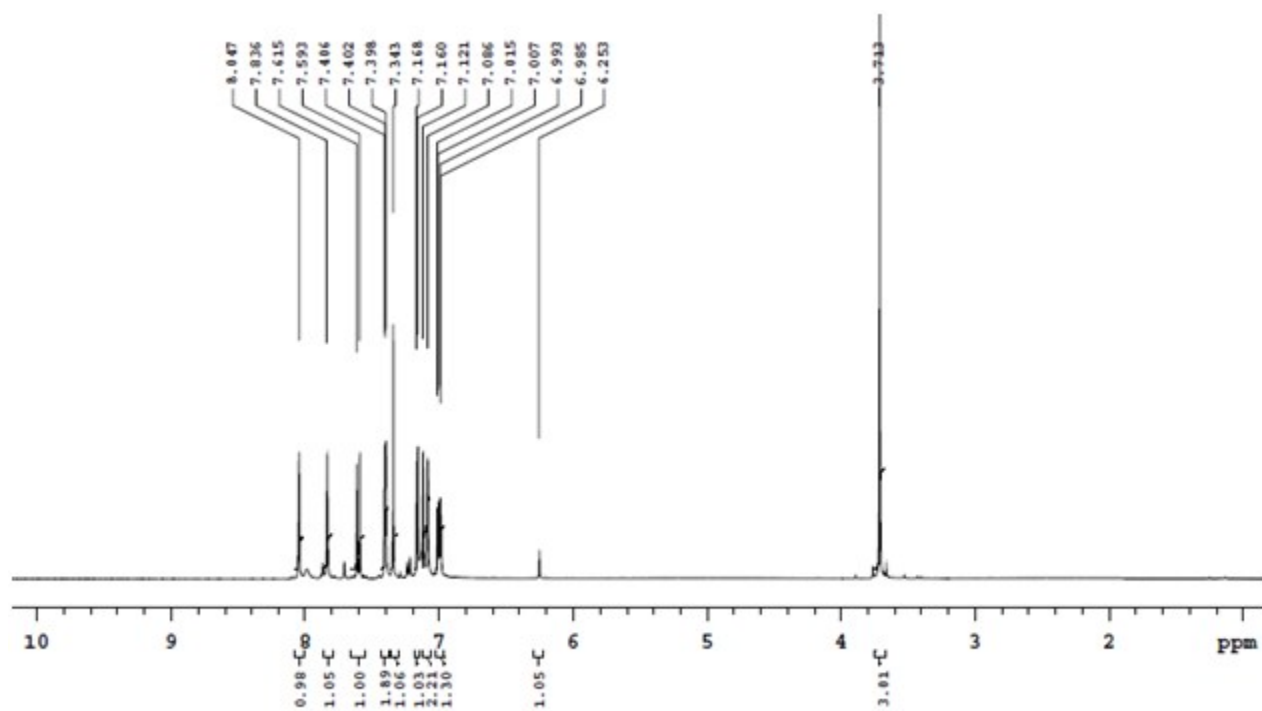

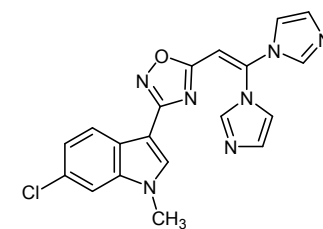

<sup>13</sup>C NMR of 3m

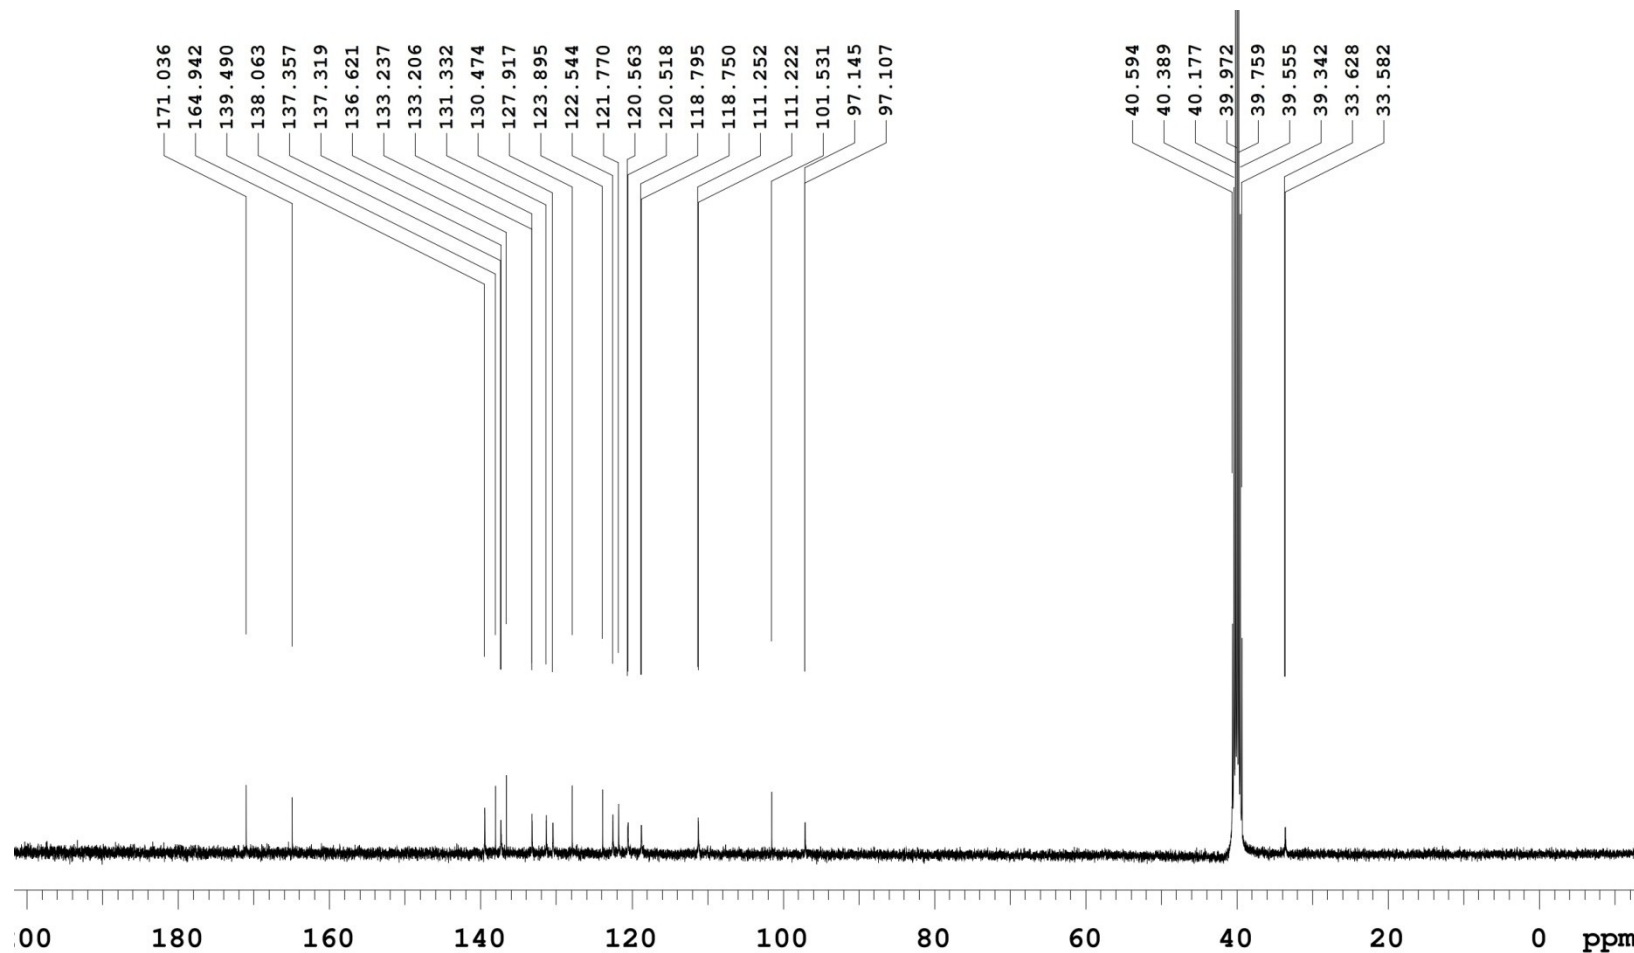

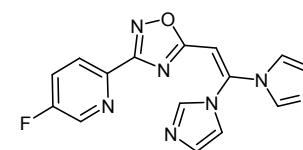

$^1\text{H}$  NMR of 3n

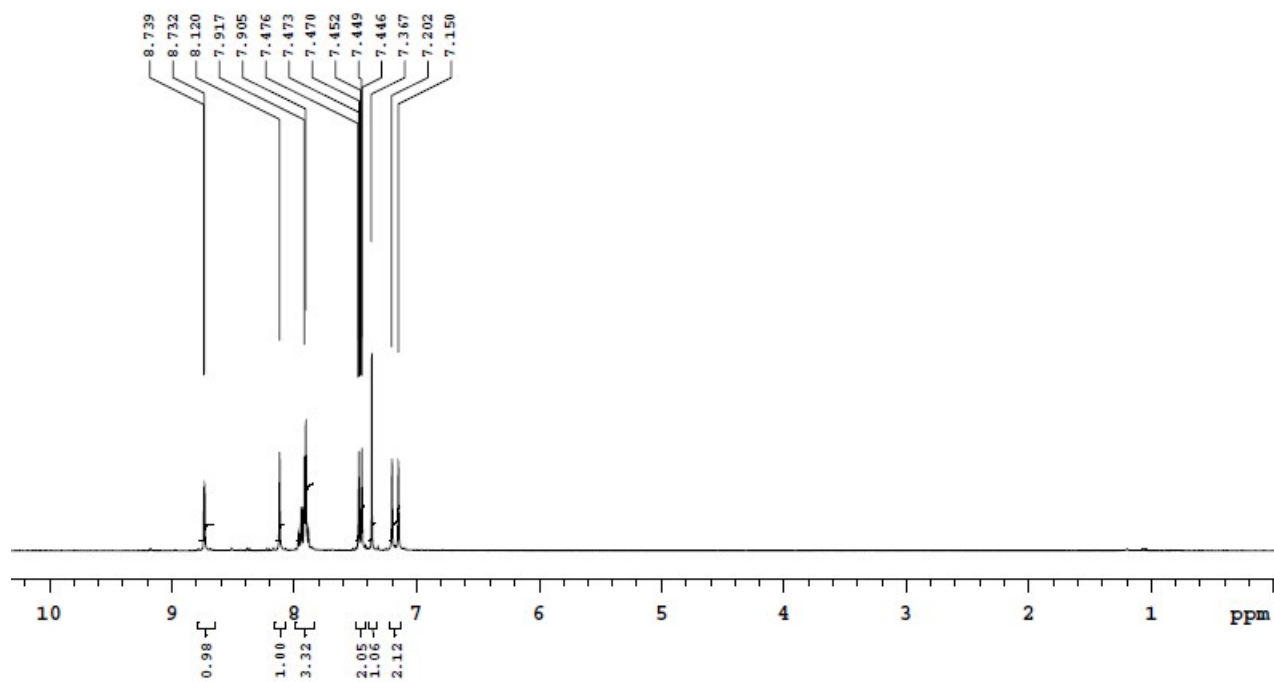

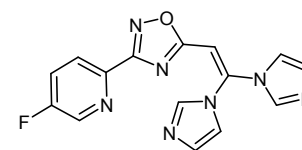

<sup>13</sup>C NMR of 3n

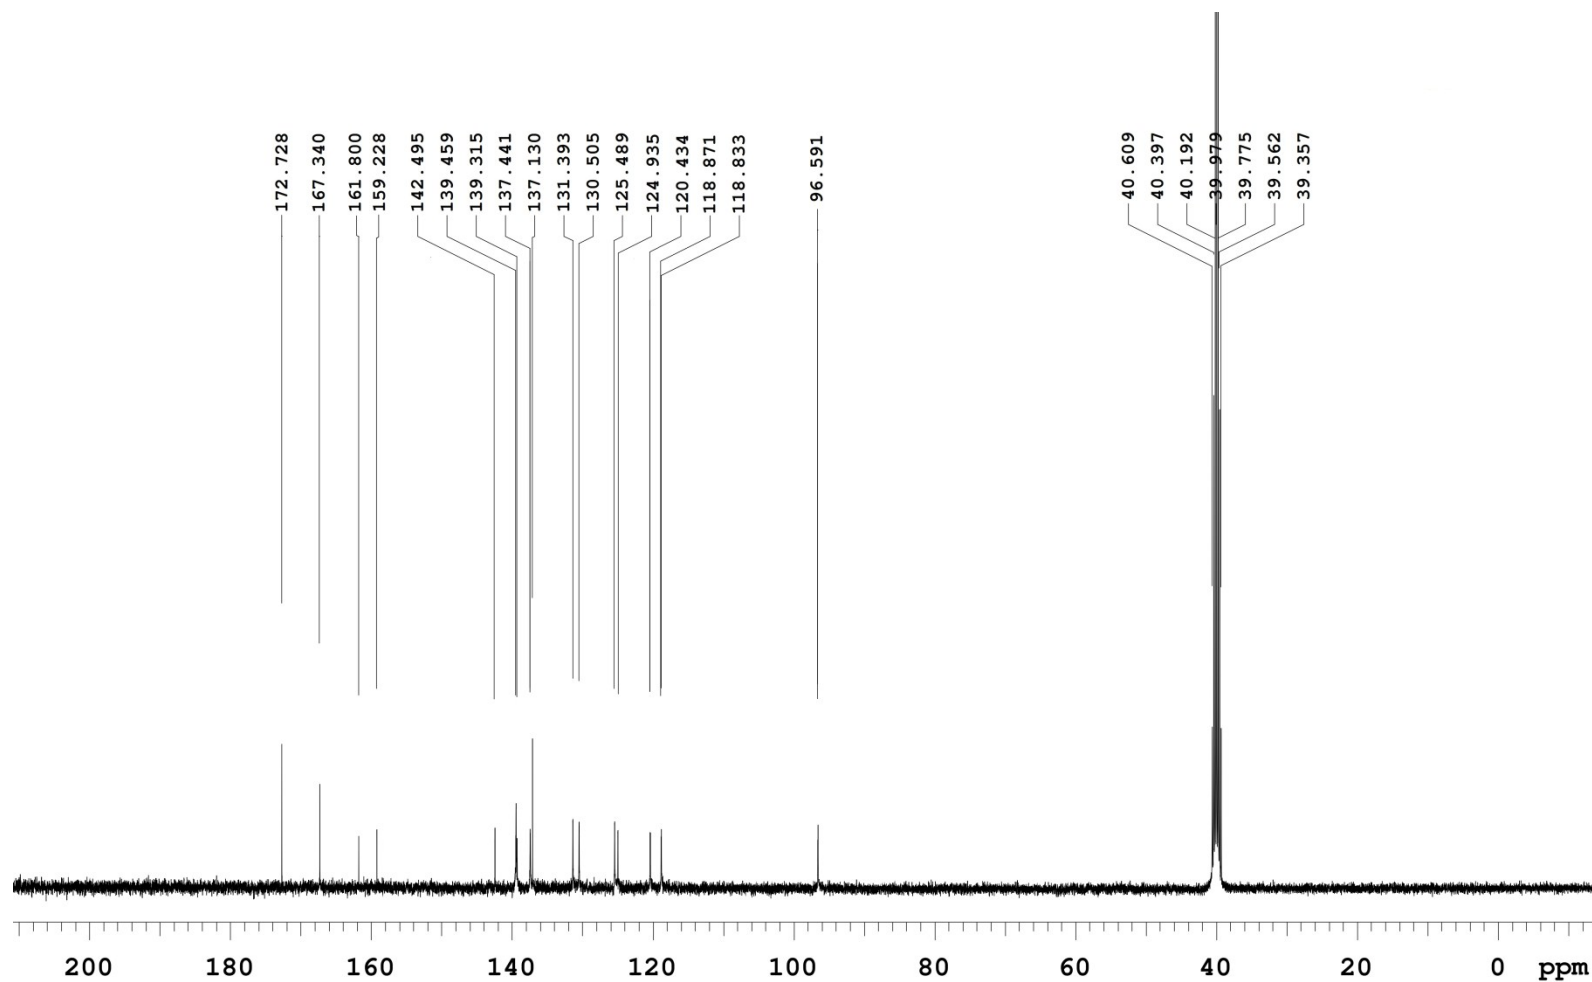

#### 4. ORTEP of 3n

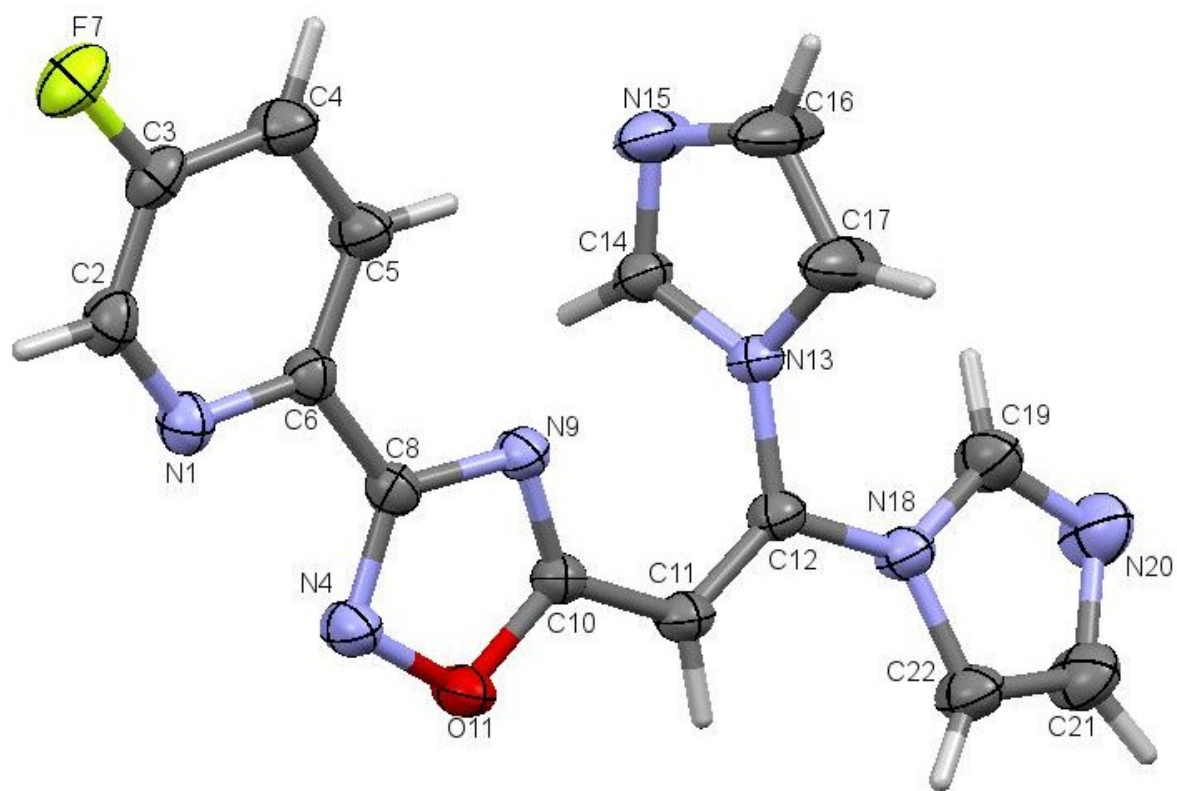

$^1\text{H}$  NMR of 3o

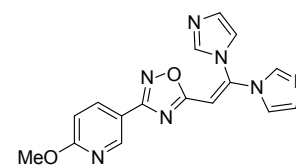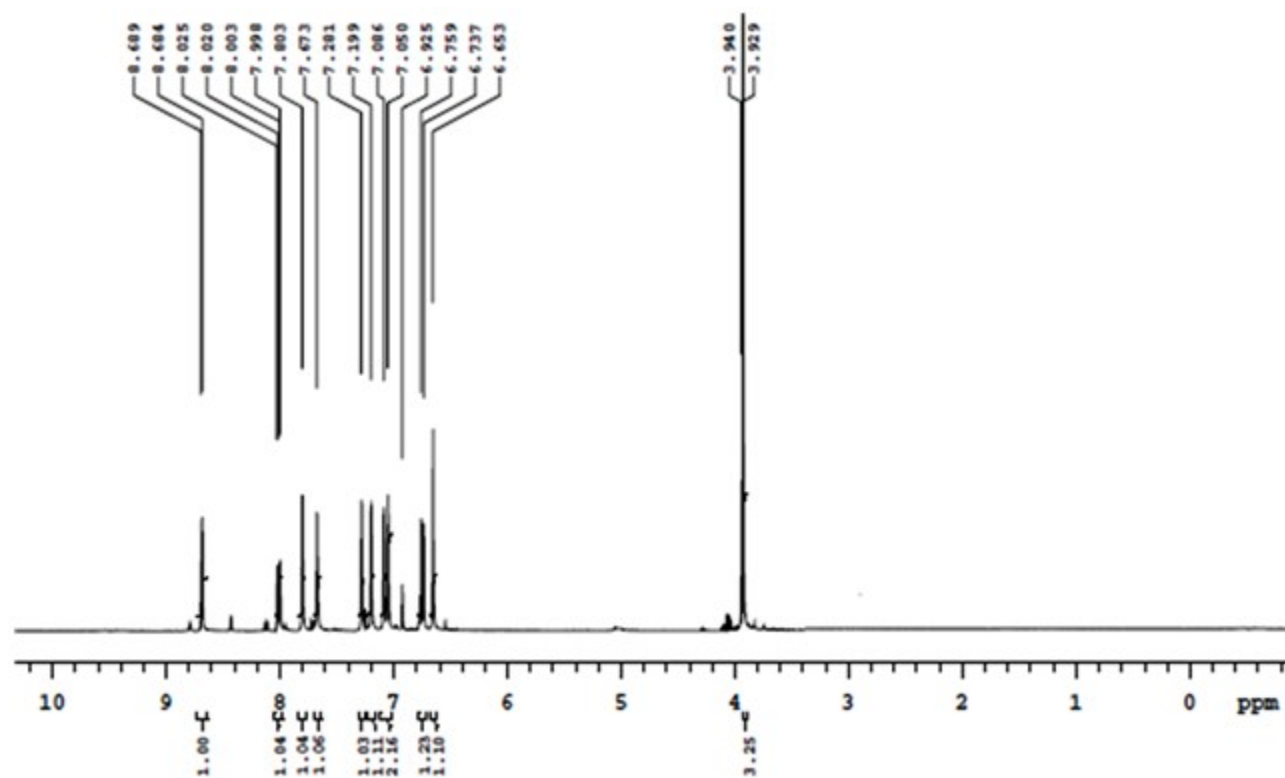



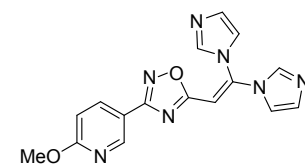

$^{13}\text{C}$  NMR of 3o

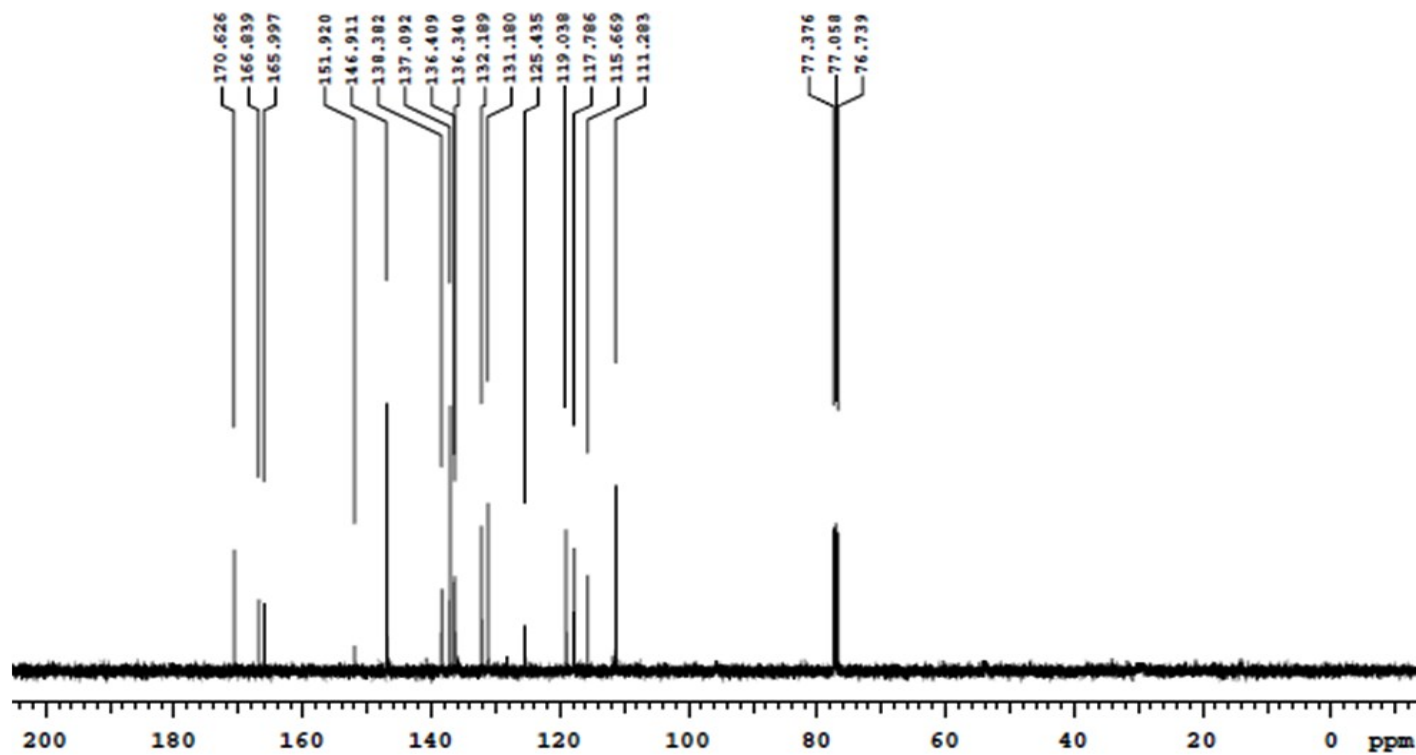

Supplement: c5nj02925b1.pdf [file c5nj02925b1.pdf]
